# Supplementary material for: Risk of cardiovascular events leading to hospitalisation after Streptococcus pneumoniae infection: a retrospective cohort LIFE Study
Source: PubMed Central journal article supplement — BMJ Open. 2022 Nov 4;12(11):e059713. doi: 10.1136/bmjopen-2021-059713 (PMC9639073; doi:10.1136/bmjopen-2021-059713), 2022-11-04
Supplement: bmjopen-2021-059713.draft_revisions.pdf [file bmjopen-2021-059713.draft_revisions.pdf]

# BMJ Open

BMJ Open is committed to open peer review. As part of this commitment we make the peer review history of every article we publish publicly available.

When an article is published we post the peer reviewers' comments and the authors' responses online. We also post the versions of the paper that were used during peer review. These are the versions that the peer review comments apply to.

The versions of the paper that follow are the versions that were submitted during the peer review process. They are not the versions of record or the final published versions. They should not be cited or distributed as the published version of this manuscript.

BMJ Open is an open access journal and the full, final, typeset and author-corrected version of record of the manuscript is available on our site with no access controls, subscription charges or pay-per-view fees (<http://bmjopen.bmj.com>).

If you have any questions on BMJ Open's open peer review process please email [info.bmjopen@bmj.com](mailto:info.bmjopen@bmj.com)

# BMJ Open

## **Risk of cardiovascular events after Streptococcus pneumoniae infection: A retrospective cohort LIFE study**

|                               |                                                                                     |
|-------------------------------|-------------------------------------------------------------------------------------|
| Journal:                      | <i>BMJ Open</i>                                                                     |
| Manuscript ID                 | bmjopen-2021-059713                                                                 |
| Article Type:                 | Original research                                                                   |
| Date Submitted by the Author: | 30-Nov-2021                                                                         |
| Complete List of Authors:     | Nishimura, Naoaki; Kyushu University<br>Fukuda, Haruhisa; Kyushu University         |
| Keywords:                     | Epidemiology < INFECTIOUS DISEASES, Cardiac Epidemiology < CARDIOLOGY, EPIDEMIOLOGY |
|                               |                                                                                     |

SCHOLARONE™  
Manuscripts

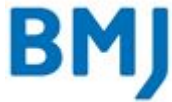

I, the Submitting Author has the right to grant and does grant on behalf of all authors of the Work (as defined in the below author licence), an exclusive licence and/or a non-exclusive licence for contributions from authors who are: i) UK Crown employees; ii) where BMJ has agreed a CC-BY licence shall apply, and/or iii) in accordance with the terms applicable for US Federal Government officers or employees acting as part of their official duties; on a worldwide, perpetual, irrevocable, royalty-free basis to BMJ Publishing Group Ltd ("BMJ") its licensees and where the relevant Journal is co-owned by BMJ to the co-owners of the Journal, to publish the Work in this journal and any other BMJ products and to exploit all rights, as set out in our [licence](#).

The Submitting Author accepts and understands that any supply made under these terms is made by BMJ to the Submitting Author unless you are acting as an employee on behalf of your employer or a postgraduate student of an affiliated institution which is paying any applicable article publishing charge ("APC") for Open Access articles. Where the Submitting Author wishes to make the Work available on an Open Access basis (and intends to pay the relevant APC), the terms of reuse of such Open Access shall be governed by a Creative Commons licence – details of these licences and which [Creative Commons](#) licence will apply to this Work are set out in our licence referred to above.

Other than as permitted in any relevant BMJ Author's Self Archiving Policies, I confirm this Work has not been accepted for publication elsewhere, is not being considered for publication elsewhere and does not duplicate material already published. I confirm all authors consent to publication of this Work and authorise the granting of this licence.

**BMJ Open****Risk of cardiovascular events after *Streptococcus pneumoniae* infection: A retrospective cohort LIFE study**Naoaki Nishimura<sup>1</sup>), Haruhisa Fukuda<sup>2</sup>)\*<sup>1</sup>) Kyushu University School of Medicine, Fukuoka, Kyushu, Japan<sup>2</sup>) Kyushu University Graduate School of Medical Sciences, Fukuoka, Kyushu, Japan**\* Corresponding Author:**

Haruhisa Fukuda, MPH, PhD

Department of Health Care Administration and Management, Kyushu University Graduate School of Medical Sciences

3-1-1 Maidashi Higashi-ku Fukuoka 812-8582, Japan

Phone: +81-92-642-6956 Fax: +81-92-642-6961

Email address: h\_fukuda@hcam.med.kyushu-u.ac.jp

**\* Word count**

2615 words

**Contributors** NN and HF designed the study. HF provided the data. NN analyzed the data. NN prepared the first draft of the manuscript. HF made critical revisions to the manuscript. All authors reviewed and approved the final draft.

**Funding** The construction of the LIFE Study database was funded by a Grant-in-Aid for Scientific Research by the Japan Society for the Promotion of Science (Grant No. JP20H00563). Data analysis and publication were funded by an Investigator-Sponsored Research grant from Pfizer Japan Inc.

**Competing interest** HF received an Investigator-Sponsored Research grant from Pfizer Japan Inc.

**Patient and public involvement** Patients and/or the public were not involved in the design, conduct, reporting, or dissemination plans of this research.

**Patient consent for publications** Not required.

**Data availability statement** The data used in this study were acquired under agreements with the participating municipalities, which stipulate that the data can only be used by authorized research institutions and cannot be shared with third parties.

## Abstract

**Objectives:** To elucidate the risk of cardiovascular event occurrence following *Streptococcus pneumoniae* infection.

**Design:** Retrospective cohort study using a LIFE Study database.

**Setting:** Three municipalities in Japan.

**Participants:** Municipality residents who were enrolled in either National Health Insurance or the Latter-Stage Elderly Healthcare System from April 2014 to March 2020.

**Exposure:** Occurrence of *S. pneumoniae* infection.

**Primary Outcome Measures:** Occurrence of one of the following cardiovascular events that led to hospitalization after *S. pneumoniae* infection: (1) coronary heart disease (CHD), (2) heart failure (HF), (3) stroke, or (4) arrhythmia.

**Results:** *S. pneumoniae*-infected patients were matched with non-infected patients for each cardiovascular event. We matched 271 infected patients and 88,407 non-infected patients for CHD, 242 infected patients and 80,025 non-infected patients for HF, 252 infected patients and 87,626 non-infected patients for stroke, and 299 infected patients and 91,631 non-infected patients for arrhythmia. During follow-up, the incidence rates for the matched infected and non-infected patients were, respectively, 59.2 (95% confidence interval: 37.5–88.8) and 53.5 (52.3–54.8) per 1000 person-years for CHD; 89.0 (60.9–125.7) and 64.7 (63.3–66.0) per 1000 person-years for HF; 95.7 (66.7–133.1) and 52.0 (50.8–53.2) per 1000 person-years for stroke; and 66.0 (43.5–96.0) and 40.0 (38.9–41.0) per 1000 person-years for arrhythmia. Infected patients were significantly more likely to develop stroke (adjusted hazard ratio: 1.86, 95% confidence interval: 1.26–2.76) and arrhythmia (1.58, 1.03–2.43) than their non-infected counterparts.

**Conclusions:** *S. pneumoniae* infections elevate the risk of subsequent stroke and arrhythmia occurrence. These findings indicate that pneumococcal infections not only have short-term effects on patients' health, but also increase their mid-to long-term susceptibility to serious cardiovascular events.

## Keywords

*Streptococcus pneumoniae* infection; cardiovascular events; retrospective cohort study

### Article Summary (Strengths and Limitations of this study)

- This study comparatively examined both *Streptococcus pneumoniae*-infected patients and non-infected controls to elucidate the association between pneumococcal infections and subsequent cardiovascular events.
- While prior studies mostly focused on short-term outcomes, our study period spanned from April 2014 to March 2020 to examine the mid-to long-term risks of cardiovascular events following pneumococcal infection.
- Despite a relatively large study sample and long study period, *S. pneumoniae* infections and cardiovascular events were identified using only diagnosis codes in the claims data.
- Our study did not account for patients' lifestyle factors (e.g., tobacco and alcohol consumption), socioeconomic factors, or pneumococcal vaccination statuses.

## Introduction

Community-acquired pneumonia is a major infectious disease that frequently leads to hospitalization, and exhibits high morbidity and mortality rates across numerous countries [1, 2]. *Streptococcus pneumoniae* is the causal pathogen for a large proportion of pneumonia cases that require hospital-based care [3]. As older persons are more susceptible to pneumococcal pneumonia [4], this condition represents a particularly serious public health problem in countries with aging populations. In addition to its acute effects, pneumonia is also known to increase the mid-to long-term health risks of infected patients, thereby placing a heavy clinical and economic burden on patients and society [2, 5].

Previous cohort studies have reported that pneumonia is associated with an increased risk of the following conditions: overall cardiac events [6-14], acute coronary syndrome [6, 8, 9, 11, 12, 14-17], heart failure (HF) [6, 9-14, 16, 18], arrhythmia [6, 8-14, 16, 17, 19, 20], and stroke [11, 12, 17]. However, the majority of these studies focused on pneumonia patients without comparisons with non-infected controls, and generally used relatively short follow-up periods. Furthermore, only a few studies in the existing literature have explored the effects of pneumonia on subsequent cardiovascular disease [7, 18, 21].

In order to accurately evaluate the impact of *S. pneumoniae* infection on subsequent cardiovascular disease, there is a need for long-term cohort studies that compare infected patients with matched non-infected controls. This study aimed to elucidate the risk of cardiovascular event occurrence following *S. pneumoniae* infection using administrative claims data acquired from infected and non-infected patients in 3 Japanese municipalities. The study also examined if these risks differ among age groups.

## Methods

### *Study data*

Data were provided by the Longevity Improvement & Fair Evidence (LIFE) Study, which is managed by Kyushu University (Fukuoka, Japan). In the LIFE Study, participating municipalities voluntarily provide administrative claims data for research purposes. These claims data are acquired from the municipalities' residents who are enrolled in either National Health Insurance or the Latter-Stage Elderly Healthcare System, and encompass information on patient characteristics and reimbursement claims for all insurance-covered healthcare provided in the inpatient and outpatient settings. Enrollees in National Health Insurance include the self-employed, agricultural and fishery workers, part-time workers, retirees, and their dependents. Enrollees in the Latter-Stage Elderly Healthcare System include residents aged  $\geq 75$  years. The number of municipalities participating in the LIFE Study varies over time owing to differences in agreement contracts, with the earliest participant providing data from April 2014. The majority of the participating municipalities provide data from April

1  
2  
3 2015 onward. As of 2021, the LIFE Study is able to conduct longitudinal studies with 5-year  
4 follow-up periods.  
5

6 For this study, claims data from April 2014 to March 2020 were acquired from  
7 insurance enrollees who were residing in 3 municipalities (residential populations: 58,000,  
8 121,600, and 305,200) in Fukuoka Prefecture.  
9  
10  
11

### 12 13 *Study subjects* 14

15 First, patients with *S. pneumoniae* infections were identified through diagnosis codes  
16 developed by Japan's Ministry of Health, Labour and Welfare. The identification method was  
17 based on the approach described by Imai et al. [22]. The occurrence of subsequent  
18 cardiovascular events (coronary heart disease [CHD], HF, arrhythmia, and stroke) was  
19 identified using International Classification of Diseases, 10th revision (ICD-10) codes. We  
20 excluded patients with records of cardiovascular events before *S. pneumoniae* infection,  
21 patients with records of cardiovascular events during the index hospitalization for *S.*  
22 *pneumoniae* infection, and patients without any claims data  $\geq 12$  months before *S. pneumoniae*  
23 infection.  
24  
25  
26  
27  
28

29 Next, we set each infected patient's index date as the last day of the month containing  
30 a recorded *S. pneumoniae* infection. The infected patients were then matched with a cohort of  
31 non-infected patients according to age (within 5 years), sex, and Charlson Comorbidity Index  
32 score at the index date using sampling without replacement. Charlson Comorbidity Index  
33 scores were calculated based on the following conditions: myocardial infarction, congestive  
34 HF, peripheral vascular disease, cerebrovascular disease, dementia, chronic pulmonary  
35 disease, rheumatic disease, peptic ulcer disease, liver disease, diabetes with/without chronic  
36 complications, hemiplegia or paraplegia, malignancy, metastatic solid tumor, and HIV/AIDS.  
37 The index date for each non-infected patient was set as the same date as his/her matched  
38 infected case. We excluded non-infected patients who had experienced cardiovascular events  
39 before their index dates.  
40  
41  
42  
43  
44  
45  
46  
47

### 48 *Outcome measure* 49

50 The outcome measure was the occurrence of a cardiovascular event that led to hospitalization  
51 after the *S. pneumoniae* infection date. Among inpatients, the infection date was set as the  
52 first date of admission for the in-hospital treatment of an *S. pneumoniae* infection. Among  
53 outpatients, the infection date was set as the first date of any medical treatment with a  
54 diagnosis code indicating an *S. pneumoniae* infection.  
55  
56  
57

58 Next, we examined the subsequent occurrence of each of the following 4  
59 cardiovascular events that led to hospitalization: (1) CHD (ICD-10 codes: I20-25), (2) HF  
60



1  
2  
3 (I11, I50), (3) stroke (I60-69), and (4) arrhythmia (I47-49). The occurrence date of each  
4 cardiovascular event was set as the date of admission for the in-hospital treatment of that  
5 event.  
6  
7

8 Patients who had died during the observation period without developing any  
9 cardiovascular event were followed-up until the last date of medical treatments in the claims  
10 data. Patients who had died during the observation period after developing a cardiovascular  
11 event were followed-up until the date of the cardiovascular event occurrence. All survivors  
12 were followed-up until the end of their municipality's observation period. The ends of the  
13 observation periods ranged from September 2019 to March 2020 among the municipalities.  
14

15 **Figure 1** shows an overview of the follow-up process.  
16  
17

### 18 *Statistical analysis*

19  
20

21 Our analysis was designed to examine the possible effects of *S. pneumoniae* infection on the  
22 subsequent occurrence of cardiovascular events, and to determine if these effects differed  
23 among age groups. For each of the 4 target cardiovascular events, we calculated the number  
24 of events for the infected group and non-infected group during the observation period, and  
25 estimated the incidence rates per 1000 person-years. Cox proportional hazards models were  
26 constructed to estimate the hazard ratio (HRs) and 95% confidence interval (CIs) of each  
27 cardiovascular event in the infected group relative to the non-infected group. The Kaplan–  
28 Meier method was used to calculate the cumulative probability of cardiovascular event  
29 occurrence in the 2 groups. In addition, we analyzed the patients stratified according to the  
30 following age groups: 0–49 years, 50–64 years, and  $\geq 65$  years.  
31  
32

33 All statistical analyses were performed using R (version 4.1.0) and R Studio (version  
34 1.4.1106) software. Two-tailed *P* values below 0.05 were considered statistically significant.  
35  
36  
37

### 38 *Ethical considerations*

39  
40  
41  
42

43 The study was approved by the Kyushu University Institutional Review Board for Clinical  
44 Research (Approval No. 2019-406).  
45  
46  
47  
48

### 49 *Patient and public involvement*

50  
51

52 Patients and the public were not involved in the design, conduct or reporting in our study.  
53  
54  
55  
56  
57  
58  
59  
60

## Results

We first identified 698 *S. pneumoniae*-infected patients and 253,302 non-infected patients between April 1, 2014 and March 31, 2020 (**Figure 2**). After applying the exclusion criteria, 489 eligible infected patients were included in the analysis. Among the infected patients that could be successfully matched with non-infected patients for each cardiovascular event, we identified 271 infected patients without prior CHD, 242 infected patients without prior HF, 252 infected patients without prior stroke, and 299 infected patients without prior arrhythmia. Using matching criteria of age, sex, and Charlson Comorbidity Index score, we matched 88,407, 80,025, 87,626, and 91,631 non-infected controls with the infected patients for CHD, HF, stroke, and arrhythmia, respectively. The non-infected patients were followed-up from the first *S. pneumoniae* infection date of their matched infected patients. **Table 1** shows the characteristics and comorbidities of the infected and non-infected patients.

**Table 2** summarizes the risk of each cardiovascular event after *S. pneumoniae* infection. The observation periods of the infected and non-infected patients (weighted by the proportion of the infected patients) were, respectively, 389 and 141,705 person-years for CHD; 359 and 135,271 person-years for HF; 366 and 140,452 person-years for stroke; and 409 and 143,792 person-years for arrhythmia. During follow-up, the incidence rates for the infected and non-infected patients were, respectively, 59.2 (95% CI: 37.5–88.8) and 53.5 (95% CI: 52.3–54.8) per 1000 person-years for CHD; 89.0 (60.9–125.7) and 64.7 (63.3–66.0) per 1000 person-years for HF; 95.7 (66.7–133.1) and 52.0 (50.8–53.2) per 1000 person-years for stroke; and 66.0 (43.5–96.0) and 40.0 (38.9–41.0) per 1000 person-years for arrhythmia. The unadjusted HRs for cardiovascular event occurrence in infected patients (relative to non-infected patients) were 1.10 (95% CI: 0.71–1.72) for CHD, 1.37 (0.92–2.05) for HF, 1.84 (1.27–2.66) for stroke, and 1.64 (1.08–2.48) for arrhythmia. After adjusting for age, sex, and Charlson Comorbidity Index score, infected patients were significantly more likely to develop stroke (adjusted HR: 1.86, 95% CI: 1.26–2.76) and arrhythmia (adjusted HR: 1.58, 95% CI: 1.03–2.43) than their non-infected counterparts. In the age-stratified analysis, *S. pneumoniae* infections were significantly associated with a substantially higher risk of stroke occurrence in patients aged 50–64 years. Among older patients aged  $\geq 65$  years, *S. pneumoniae* infections were significantly associated with an increased risk for all 4 cardiovascular events.

**Figure 3** presents the Kaplan–Meier curves of each cardiovascular event. When compared with non-infected patients, infected patients had a significantly higher risk of incident HF, stroke, and arrhythmia (all  $P < 0.0001$ ); but not CHD ( $P = 0.064$ ).

## Discussion

Through an analysis of National Health Insurance and Latter-Stage Elderly Healthcare System enrollees residing in 3 Japanese municipalities, this study comparatively examined the incidence of cardiovascular events between *S. pneumoniae*-infected patients and non-infected

1  
2  
3 patients. Our results showed that the experience of *S. pneumoniae* infection significantly  
4 elevates the risk of subsequent stroke and arrhythmia. Among patients aged 50–64 years, *S.*  
5 *pneumoniae* infection was associated with an increased risk of stroke. Furthermore, *S.*  
6 *pneumoniae* infection increased the risk of all 4 cardiovascular events among older patients  
7 aged  $\geq 65$  years. These findings may help to identify at-risk targets for expanded  
8 pneumococcal vaccination programs.  
9  
10  
11

12 Recent studies have shown that patients with community-acquired pneumonia have a  
13 higher frequency of cardiovascular events [8, 10, 11, 16, 18, 21, 24, 25]. Our estimated  
14 incidence of arrhythmia after *S. pneumoniae* infection (9.0%) was slightly higher than that of  
15 a previous meta-analysis, which estimated an overall incidence of 7.2% among inpatients with  
16 community-acquired pneumonia [24]. This discrepancy may be explained by the fact that the  
17 meta-analysis had only included studies with short-term outcomes.  
18  
19  
20

21 In our analysis, the estimated incidence of stroke after *S. pneumoniae* infection was  
22 considerably higher than those found in previous studies [11,16]. Perry et al. reported a stroke  
23 incidence of 0.17% in 40,979 patients during 90 days of admission for pneumonia, whereas  
24 Violi et al. reported a stroke incidence of 1.0% in 1,182 patients hospitalized for community-  
25 acquired pneumonia during in-hospital follow-up (median length of hospital stay: 11 days).  
26 Accordingly, those 2 studies had focused on the short-term incidence of stroke. However, the  
27 risk of stroke increases with age, and longer follow-up periods after *S. pneumoniae* infection  
28 would therefore provide a more accurate depiction of its risks. Furthermore, Perry et al. used  
29 ICD-9 codes to identify stroke, whereas Violi et al. identified stroke cases through clinical  
30 manifestations confirmed by computed tomography or magnetic resonance imaging [11,16].  
31 Stroke diagnostic methods are generally reliant on imaging data, and many medical facilities  
32 in Japan are equipped with on-site computed tomography and/or magnetic resonance imaging  
33 scanners. This enables the accurate diagnosis of stroke, including cases of milder strokes,  
34 throughout Japan.  
35  
36  
37  
38  
39  
40  
41

42 Among the studies that reported a high frequency of subsequent cardiovascular events  
43 in pneumonia patients, few have actually compared infected patients with non-infected  
44 controls. Eurich et al. performed a long-term prospective cohort study of both inpatients and  
45 outpatients with community-acquired pneumonia, and found that these infections substantially  
46 increased the risk of HF across different age groups and disease severity [18]. During a  
47 median follow-up period of 9.9 years, 11.9% of patients with pneumonia developed incident  
48 HF compared with 7.4% of the non-infected controls; furthermore, 13.3% of patients with  
49 pneumococcal bacteremia developed incident HF [18]. In contrast, 13.0% of our infected  
50 patients developed incident HF compared with 12.0% of their non-infected counterparts, with  
51 no significant difference between the groups. This discrepancy may be influenced by the fact  
52 that Eurich et al. used a control group that only controlled for age (five-year age bands) and  
53 sex, only investigated outpatients in emergency departments, and focused on severe  
54 pneumonia infections. In contrast, our study included outpatients from all types of medical  
55  
56  
57  
58  
59  
60

1  
2  
3 institutions, and our control group comprised patients without any *S. pneumoniae* infection.  
4 Our study also utilized a research design that differed from Eurich et al. [18], which only  
5 matched for age and sex, and adjusted for the effects for coexisting conditions by including  
6 them as covariates in analytical models. However, we matched infected patients and non-  
7 infected controls not only by age and sex, but also by coexisting conditions through Charlson  
8 Comorbidity Index scores.  
9  
10

11  
12 To our knowledge, few studies have shown the long-term risks of subsequent  
13 arrhythmia and stroke after *S. pneumoniae* infection (including non-hospitalized cases)  
14 relative to non-infected controls. Severe cases of pneumonia require hospital-based care,  
15 especially among older adults. Therefore, studies that focus on hospitalized pneumonia  
16 patients would overlook the risks associated with less severe cases. For example, although  
17 patients aged  $\leq 65$  years may have milder *S. pneumoniae* infections and a correspondingly  
18 lower risk of hospitalization than older patients, these infections could still elevate the risk of  
19 subsequent cardiovascular events in the younger age groups. As this study used insurance  
20 claims data that incorporated both inpatient and outpatient data, we were able to identify the  
21 risk of cardiovascular events after *S. pneumoniae* infection in patients regardless of whether  
22 they required hospitalization. Moreover, our study excluded patients who had subsequent  
23 cardiovascular events during the index hospital stay for *S. pneumoniae* infection. For patients  
24 who were admitted to hospital due to *S. pneumoniae* infection, we only monitored for  
25 cardiovascular events that occurred after discharge. Most studies have reported the short-term  
26 risks of cardiovascular events during or after acute infections, and the long-term impact of  
27 pneumonia on subsequent cardiovascular disease occurrence is less clear. Therefore, our study  
28 provides new insight into the mid-to long-term effects of milder *S. pneumoniae* infections  
29 treated in outpatient settings as well as severe *S. pneumoniae* infections that require  
30 hospitalization.  
31  
32

33  
34 A previous study identified the major causative organisms of community-acquired  
35 pneumonia to be *S. pneumoniae*, *Haemophilus influenzae*, *Mycoplasma pneumoniae*,  
36 *Chlamydomphila pneumoniae*, *Legionella pneumophila*, *Staphylococcus aureus*, and several  
37 viral pathogens (including influenza A and B) [26]. *S. pneumoniae* reportedly reduces cardiac  
38 contractility by increasing cardiomyocyte uptake of bacterial cell wall antigens [27]. Many  
39 studies that seek to understand the pathogenesis of cardiovascular events following  
40 pneumonia focus on infections caused by *S. pneumoniae* [28]. Several studies have proposed  
41 that *S. pneumoniae* cell wall components and pneumolysin (a pore-forming toxin) trigger pro-  
42 inflammatory mechanisms that ultimately result in cardiac damage [29-32]. Furthermore, the  
43 infection-mediated hyperactivation of platelets can create a pro-inflammatory and  
44 prothrombotic environment that facilitates the occurrence of cardiovascular events and  
45 cardiac damage [30]. Pneumonia and other infections can trigger fever, hypoxia, and  
46 hemodynamic disturbance in patients, which are all risk factors of atrial fibrillation and its  
47 associated cardiac damage [33].  
48  
49  
50  
51  
52  
53  
54  
55  
56  
57  
58  
59  
60

1  
2  
3 The study limitations are as follows. First, *S. pneumoniae* infections and  
4 cardiovascular events were identified using diagnosis codes and ICD-10 codes, respectively.  
5 Therefore, our analysis may be vulnerable to coding errors. Second, our study could not  
6 account for patients' lifestyle factors (e.g., tobacco and alcohol consumption), socioeconomic  
7 factors, or pneumococcal vaccination statuses. Third, our study population was limited to  
8 enrollees of Japan's National Health Insurance and Latter-Stage Elderly Healthcare System,  
9 and the findings may not be extrapolatable to those enrolled in other insurance systems.  
10  
11  
12  
13  
14  
15

### 16 *Conclusion*

17  
18 *S. pneumoniae* infections elevate the risk of subsequent stroke and arrhythmia occurrence.  
19 These findings indicate that pneumococcal infections do not only have short-term effects on  
20 patient health, but also increase the mid-to long-term susceptibility to serious cardiovascular  
21 events. With a greater understanding of *S. pneumoniae* infection's far-reaching impact, further  
22 studies are needed to explore the possible benefits of expanding current pneumococcal  
23 vaccination programs.  
24  
25  
26  
27  
28  
29  
30  
31  
32  
33  
34  
35  
36  
37  
38  
39  
40  
41  
42  
43  
44  
45  
46  
47  
48  
49  
50  
51  
52  
53  
54  
55  
56  
57  
58  
59  
60

## References

1. Trotter CL, Stuart JM, George R, Miller E. Increasing hospital admissions for pneumonia, England. *Emerg Infect Dis* 2008; 14: 727–33
2. Eurich DT, Marrie TJ, Minhas-Sandhu JK, Majumdar SR. Ten-Year Mortality after Community-acquired Pneumonia. A Prospective Cohort. *Am J Respir Crit Care Med* 2015; 192: 597-604.
3. Musher DM. *Streptococcus pneumoniae*. In: Mandell GL, Bennett JE, Dolin R, eds. *Mandell, Douglas and Bennett's principles and practice of infectious diseases*. Philadelphia: Churchill Livingstone 2005: 2392–411
4. Fry AM, Shay DK, Holman RC, Curns AT, Anderson LJ. Trends in hospitalizations for pneumonia among persons aged 65 years or older in the United States, 1988–2002. *JAMA* 2005; 294: 2712–2719.
5. Jasti H, Mortensen EM, Obrosky DS, Kapoor WN, Fine MJ. Causes and risk factors for rehospitalization of patients hospitalized with community-acquired pneumonia. *Clin Infect Dis* 2008; 46: 550–6.
6. Postma DF, Spitoni C, Van Werkhoven CH, Van Elden LJR, Oosterheert JJ, Bonten MJM. Cardiac events after macrolides or fluoroquinolones in patients hospitalized for community-acquired pneumonia: Post-hoc analysis of a cluster-randomized trial. *BMC Infect Dis* 2019; 19: 17.
7. Corrales-Medina VF, Alvarez KN, Weissfeld LA, Angus DC, Chirinos JA, Chang CH, Newman A, Loehr L, Folsom AR, Elkind MS, et al. Association Between Hospitalization for Pneumonia and Subsequent Risk of Cardiovascular Disease. *JAMA* 2015; 313: 264–274.
8. Cangemi R, Calvieri C, Falcone M, et al. Relation of Cardiac Complications in the Early Phase of Community-Acquired Pneumonia to Long-Term Mortality and Cardiovascular Events. *Am J Cardiol* 2015; 116: 647-651.
9. Griffin AT, Wiemken TL, Arnold FW. Risk factors for cardiovascular events in hospitalized patients with community-acquired pneumonia. *Int J Infect Dis* 2013; 17: e1125-e1129.
10. Corrales-Medina VF, Musher DM, Wells GA, Chirinos JA, Chen L, Fine MJ. Cardiac complications in patients with community-acquired pneumonia: incidence, timing, risk factors, and association with short-term mortality. *Circulation* 2012; 125: 773-781.
11. Violi F, Cangemi R, Falcone M, et al. Cardiovascular Complications and Short-term Mortality Risk in Community-Acquired Pneumonia. *Clin Infect Dis* 2017; 64: 1486-1493.
12. Aliberti S, Ramirez J, Cosentini R, et al. Acute myocardial infarction versus other cardiovascular events in community-acquired pneumonia. *ERJ Open Res* 2015; 1: 00020-2015
13. Viasus D, Garcia-Vidal C, Manresa F, Dorca J, Gudiol F, Carratalà J. Risk stratification and prognosis of acute cardiac events in hospitalized adults with community-acquired pneumonia. *J Infect* 2013; 66: 27-33.
14. Cilli A, Cakin O, Aksoy E, et al. Acute cardiac events in severe community-acquired pneumonia: A multicenter study. *Clin Respir J* 2018; 12: 2212-2219.
15. Chen PC, Liao WI, Wang YC, et al. An Elevated Glycemic Gap is Associated With Adverse Outcomes in Diabetic Patients With Community-Acquired Pneumonia. *Medicine* 2015; 94: e1456.
16. Perry TW, Pugh MJ, Waterer GW, et al. Incidence of cardiovascular events after hospital admission for pneumonia. *Am J Med* 2011; 124: 244-251.
17. Mandal P, Chalmers JD, Choudhury G, Akram AR, Hill AT. Vascular complications are associated with poor outcome in community-acquired pneumonia. *QJM* 2011; 104: 489-495.
18. Eurich DT, Marrie TJ, Minhas-Sandhu JK, Majumdar SR. Risk of heart failure after community acquired pneumonia: prospective controlled study with 10 years of follow-up. *BMJ* 2017; 356: j413.
19. Cangemi R, Calvieri C, Taliani G, et al. Left Atrium Dilatation and Left Ventricular Hypertrophy Predispose to Atrial Fibrillation in Patients With Community-Acquired Pneumonia. *Am J Cardiol* 2019; 124: 723-728.
20. Pieralli F, Biondo B, Vannucchi V, et al. Performance of the CHA2DS2-VASc score in predicting new onset atrial fibrillation during hospitalization for community-acquired pneumonia. *Eur J Intern Med* 2019; 62: 24-28.
21. Corrales-Medina VF, Serpa J, Rueda AM, et al. Acute bacterial pneumonia is associated with the occurrence of acute coronary syndromes. *Medicine*. 2009; 88: 154-159.
22. Imai K, Petigara T, Kohn MA, Nakashima K, Aoshima M, Shito A, Kanazu S. Risk of pneumococcal diseases in adults with underlying medical conditions: a retrospective, cohort study using two Japanese healthcare databases. *BMJ Open* 2018; 8: e018553.
23. Quan H, Li B, Couris CM, et al. Updating and validating the Charlson comorbidity index and score for risk adjustment in hospital discharge abstracts using data from 6 countries. *Am J Epidemiol* 2011; 173: 676-682.
24. Tralhão A, Póvoa P. Cardiovascular Events After Community-Acquired Pneumonia: A Global Perspective with Systematic Review and Meta-Analysis of Observational Studies. *J Clin Med* 2020; 9: 414.
25. Musher DM, Rueda AM, Kaka AS, Mapara SM. The association between pneumococcal pneumonia and acute cardiac events. *Clin Infect Dis* 2007; 45: 158-165.
26. Chong CP, Street PR. Pneumonia in the elderly: a review of the epidemiology, pathogenesis, microbiology, and clinical features. *South Med J* 2008; 101: 1141-1179.
27. Fillon S, Soulis K, Rajasekaran S, et al. Platelet-activating factor receptor and innate immunity: uptake of

- 1  
2  
3 gram-positive bacterial cell wall into host cells and cell-specific pathophysiology. *J Immunol* 2006; 177:  
4 6182-6191.
- 5 28. Feldman C, Anderson R. Platelets and Their Role in the Pathogenesis of Cardiovascular Events in Patients  
6 With Community-Acquired Pneumonia. *Front Immunol* 2020; 11: 577303.
- 7 29. Feldman C, Normark S, Henriques-Normark B, Anderson R. Pathogenesis and prevention of risk of  
8 cardiovascular events in patients with pneumococcal community-acquired pneumonia. *J Intern Med* 2019;  
9 285: 635-652.
- 10 30. Anderson R, Nel JG, Feldman C. Multifaceted Role of Pneumolysin in the Pathogenesis of Myocardial Injury  
11 in Community-Acquired Pneumonia. *Int J Mol Sci* 2018; 19: 1147.
- 12 31. Shenoy AT, Beno SM, Brissac T, Bell JW, Novak L, Orihuela CJ. Severity and properties of cardiac damage  
13 caused by *Streptococcus pneumoniae* are strain dependent. *PLoS One* 2018; 13: e0204032.
- 14 32. Alhamdi Y, Neill DR, Abrams ST, et al. Circulating Pneumolysin Is a Potent Inducer of Cardiac Injury during  
15 Pneumococcal Infection. *PLoS Pathog* 2015; 11: e1004836.
- 16 33. Kirchhof P, Benussi S, Kotecha D, et al. 2016 ESC Guidelines for the management of atrial fibrillation  
17 developed in collaboration with EACTS. *Eur Heart J* 2016; 37: 2893-2962.
- 18  
19  
20  
21  
22  
23  
24  
25  
26  
27  
28  
29  
30  
31  
32  
33  
34  
35  
36  
37  
38  
39  
40  
41  
42  
43  
44  
45  
46  
47  
48  
49  
50  
51  
52  
53  
54  
55  
56  
57  
58  
59  
60

**Table 1. Characteristics and comorbidities of *Streptococcus pneumoniae*-infected and non-infected patients**

|                                        | CHD          |           | HF           |           | Stroke       |           | Arrhythmia   |           |
|----------------------------------------|--------------|-----------|--------------|-----------|--------------|-----------|--------------|-----------|
|                                        | Non-infected | Infected  | Non-infected | Infected  | Non-infected | Infected  | Non-infected | Infected  |
| N                                      | 88,407       | 271       | 80,025       | 242       | 87,626       | 252       | 91,631       | 299       |
| Cardiovascular event incidence         | 7,588 (8.6%) | 23 (8.5%) | 8,746 (11%)  | 32 (13%)  | 7,308 (8.3%) | 35 (14%)  | 5,745 (6.3%) | 27 (9.0%) |
| Age, mean (y)                          | 77.4         | 77.6      | 75.9         | 76.2      | 76.5         | 76.8      | 77.9         | 78.1      |
| Men                                    | 45,345 (51%) | 139 (51%) | 44,642 (56%) | 135 (56%) | 47,290 (54%) | 136 (54%) | 48,114 (53%) | 157 (53%) |
| Women                                  | 43,062 (49%) | 132 (49%) | 35,383 (44%) | 107 (44%) | 40,336 (46%) | 116 (46%) | 43,517 (47%) | 142 (47%) |
| Myocardial infarction                  | 0 (0%)       | 0 (0%)    | 992 (1.2%)   | 3 (1.2%)  | 695 (0.8%)   | 2 (0.8%)  | 1,226 (1.3%) | 4 (1.3%)  |
| Congestive heart failure               | 13,375 (15%) | 41 (15%)  | 4,299 (5.4%) | 13 (5.4%) | 11,127 (13%) | 32 (13%)  | 11,952 (13%) | 39 (13%)  |
| Peripheral vascular disease            | 4,567 (5.2%) | 14 (5.2%) | 6,283 (7.9%) | 19 (7.9%) | 6,954 (7.9%) | 20 (7.9%) | 6,742 (7.4%) | 22 (7.4%) |
| Cerebrovascular disease                | 17,290 (20%) | 53 (20%)  | 15,542 (19%) | 47 (19%)  | 7,998 (9.1%) | 23 (9.1%) | 19,307 (21%) | 63 (21%)  |
| Dementia                               | 13,701 (15%) | 42 (15%)  | 9,590 (12%)  | 29 (12%)  | 7,302 (8.3%) | 21 (8.3%) | 12,565 (14%) | 41 (14%)  |
| Chronic pulmonary disease              | 30,665 (35%) | 94 (35%)  | 29,761 (37%) | 90 (37%)  | 31,643 (36%) | 91 (36%)  | 33,404 (36%) | 109 (36%) |
| Rheumatic disease                      | 2,610 (3.0%) | 8 (3.0%)  | 3,637 (4.5%) | 11 (4.5%) | 3,477 (4.0%) | 10 (4.0%) | 3,677 (4.0%) | 12 (4.0%) |
| Peptic ulcer disease                   | 8,156 (9.2%) | 25 (9.2%) | 8,598 (11%)  | 26 (11%)  | 7,650 (8.7%) | 22 (8.7%) | 7,968 (8.7%) | 26 (8.7%) |
| Mild liver disease                     | 15,659 (18%) | 48 (18%)  | 17,195 (21%) | 52 (21%)  | 15,995 (18%) | 46 (18%)  | 15,016 (16%) | 49 (16%)  |
| Diabetes without chronic complications | 1,957 (2.2%) | 6 (2.2%)  | 2,315 (2.9%) | 7 (2.9%)  | 2,434 (2.8%) | 7 (2.8%)  | 1,839 (2.0%) | 6 (2.0%)  |
| Diabetes with chronic complications    | 3,262 (3.7%) | 10 (3.7%) | 3,968 (5.0%) | 12 (5%)   | 4,520 (5.2%) | 13 (5.2%) | 3,677 (4.0%) | 12 (4.0%) |
| Hemiplegia or paraplegia               | 1,305 (1.5%) | 4 (1.5%)  | 1,323 (1.7%) | 4 (1.7%)  | 348 (0.4%)   | 1 (0.4%)  | 919 (1.0%)   | 3 (1.0%)  |
| Renal disease                          | 3,262 (3.7%) | 10 (3.7%) | 3,968 (5.0%) | 12 (5%)   | 4,868 (5.6%) | 14 (5.6%) | 5,210 (5.7%) | 17 (5.7%) |
| Malignancy                             | 8,808 (10%)  | 27 (10%)  | 11,243 (14%) | 34 (14%)  | 10,432 (12%) | 30 (12%)  | 10,113 (11%) | 33 (11%)  |
| Moderate or severe liver disease       | 0 (0%)       | 0 (0%)    | 331 (0.4%)   | 1 (0.4%)  | 0 (0%)       | 0 (0%)    | 306 (0.3%)   | 1 (0.3%)  |
| Metastatic solid tumor                 | 1,957 (2.2%) | 6 (2.2%)  | 1,653 (2.1%) | 5 (2.1%)  | 1,391 (1.6%) | 4 (1.6%)  | 1,226 (1.3%) | 4 (1.3%)  |
| HIV/AIDS                               | 0 (0%)       | 0 (0%)    | 0 (0%)       | 0 (0%)    | 0 (0%)       | 0 (0%)    | 0 (0%)       | 0 (0%)    |

Values are presented as number (percentage) unless stated otherwise. Abbreviations: CHD, coronary heart disease; HF, heart failure.



**Table 2. Cardiovascular events in *Streptococcus pneumoniae*-infected and non-infected patients**

|                                               | CHD              |                   | HF               |                    | Stroke           |                     | Arrhythmia       |                   |
|-----------------------------------------------|------------------|-------------------|------------------|--------------------|------------------|---------------------|------------------|-------------------|
|                                               | Non-infected     | Infected          | Non-infected     | Infected           | Non-infected     | Infected            | Non-infected     | Infected          |
| Overall                                       |                  |                   |                  |                    |                  |                     |                  |                   |
| N                                             | 88,407           | 271               | 80,025           | 242                | 87,626           | 252                 | 91,631           | 299               |
| Incidence, n (%)                              | 7,588 (8.6%)     | 23 (8.5%)         | 8,746 (11%)      | 32 (13%)           | 7,308 (8.3%)     | 35 (14%)            | 5,745 (6.3%)     | 27 (9.0%)         |
| Person-years of follow-up                     | 141,705          | 389               | 135,271          | 359                | 140,452          | 366                 | 143,792          | 409               |
| Incidence rate per 1000 person-years (95% CI) | 53.5 (52.3-54.8) | 59.2 (37.5-88.8)  | 64.7 (63.3-66.0) | 89 (60.9-125.7)    | 52 (50.8-53.2)   | 95.7 (66.7 - 133.1) | 40 (38.9-41.0)   | 66 (43.5-96.0)    |
| Unadjusted Hazard ratio (95% CI)              | -                | 1.10 (0.71-1.72)  | -                | 1.37 (0.92-2.05)   | -                | 1.84 (1.27-2.66)    | -                | 1.64 (1.08-2.48)  |
| Adjusted hazard ratio <sup>a</sup> (95% CI)   | -                | 1.12 (0.71-1.78)  | -                | 1.34 (0.88-2.06)   | -                | 1.86 (1.26-2.76)    | -                | 1.58 (1.03-2.43)  |
| By age group                                  |                  |                   |                  |                    |                  |                     |                  |                   |
| N (%)                                         |                  |                   |                  |                    |                  |                     |                  |                   |
| 0-49 years                                    | 3,674 (4.2%)     | 11 (4.1%)         | 3,729 (4.7%)     | 11 (4.5%)          | 3,574 (4.1%)     | 10 (4.0%)           | 3,459 (3.8%)     | 11 (3.7%)         |
| 50-64 years                                   | 7,730 (8.7%)     | 25 (9.2%)         | 7,256 (9.1%)     | 22 (9.1%)          | 7,661 (8.7%)     | 23 (9.1%)           | 7,639 (8.3%)     | 25 (8.4%)         |
| ≥65 years                                     | 77,003 (87%)     | 235 (87%)         | 69,039 (86%)     | 209 (86%)          | 76,390 (87%)     | 219 (87%)           | 80,533 (88%)     | 263 (88%)         |
| Incidence rate per 1000 person-years (95% CI) |                  |                   |                  |                    |                  |                     |                  |                   |
| 0-49 years                                    | 4.6 (3.2-6.4)    | 0 (0-185.8)       | 3.7 (2.4-5.4)    | 0 (0-185.8)        | 4.6 (3.2-6.5)    | 0 (0-200.4)         | 8.3 (6.3-10.8)   | 0 (0-185.8)       |
| 50-64 years                                   | 29.5 (27.0-32.1) | 18.9 (0.5-105.5)  | 11.8 (10.2-13.5) | 20.9 (0.5-116.4)   | 7.4 (6.2-8.7)    | 60.0 (12.4-175.3)   | 15.0 (13.3-16.9) | 19.1 (0.5-106.2)  |
| ≥65 years                                     | 60.3 (58.9-61.8) | 69.6 (43.6-105.4) | 76.9 (75.3-78.6) | 106.3 (72.2-150.8) | 62.2 (60.8-63.7) | 107.6 (73.6-152.0)  | 45.5 (44.3-46.7) | 77.1 (50.4-113.0) |
| Adjusted hazard ratio <sup>a</sup> (95% CI)   |                  |                   |                  |                    |                  |                     |                  |                   |
| 0-49 years                                    | -                | 0                 | -                | 0                  | -                | 0                   | -                | 0                 |
| 50-64 years                                   | -                | 0.75 (0.08-6.85)  | -                | 2.34 (0.31-17.9)   | -                | 7.97 (2.47-25.8)    | -                | 1.85 (0.26-13.5)  |
| ≥65 years                                     | -                | 1.17 (0.73-1.88)  | -                | 1.34 (0.87-2.07)   | -                | 1.73 (1.15-2.61)    | -                | 1.60 (1.03-2.49)  |

<sup>a</sup> Adjusted for age, sex, and Charlson Comorbidity Index score.

Abbreviations: CHD, coronary heart disease; HF, heart failure; CI, confidence interval.

## Figure legends

### Figure 1. Overview of the follow-up process for *Streptococcus pneumoniae*-infected and non-infected patients

Endpoints refer to the occurrence of a target cardiovascular event.

### Figure 2. Selection of *Streptococcus pneumoniae*-infected and non-infected patients for analysis

Abbreviations: CHD, coronary heart disease; HF, heart failure.

### Figure 3. Kaplan–Meier estimates for cardiovascular events in *Streptococcus pneumoniae*-infected and non-infected patients

(A) Coronary heart disease (CHD), (B) heart failure (HF), (C) stroke, and (D) arrhythmia

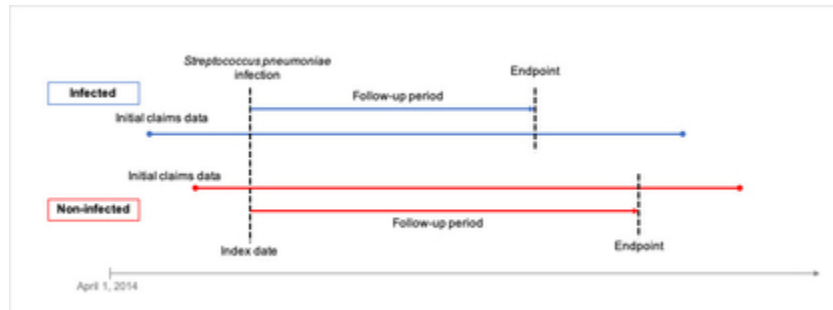

Figure 1. Overview of the follow-up process for Streptococcus pneumoniae-infected and non-infected patients  
Endpoints refer to the occurrence of a target cardiovascular event.

35x12mm (300 x 300 DPI)

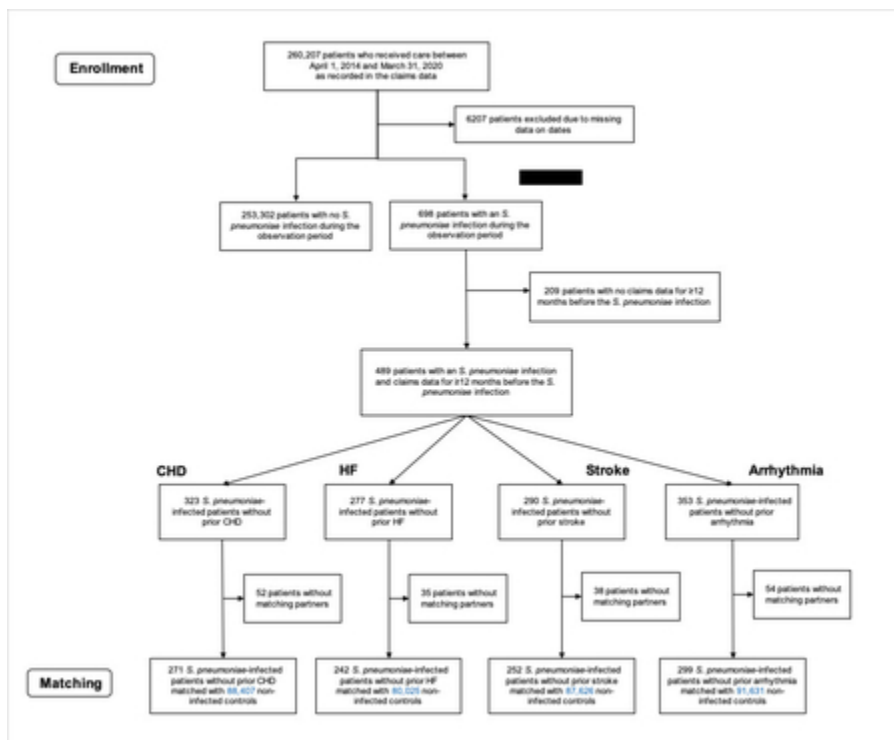

Figure 2. Selection of Streptococcus pneumoniae-infected and non-infected patients for analysis. Abbreviations: CHD, coronary heart disease; HF, heart failure.

37x31mm (300 x 300 DPI)

1  
2  
3  
4  
5  
6  
7  
8  
9  
10  
11  
12  
13  
14  
15  
16  
17  
18  
19  
20  
21  
22  
23  
24  
25  
26  
27  
28  
29  
30  
31  
32  
33  
34  
35  
36  
37  
38  
39  
40  
41  
42  
43  
44  
45  
46  
47  
48  
49  
50  
51  
52  
53  
54  
55  
56  
57  
58  
59  
60

**(A) CHD**

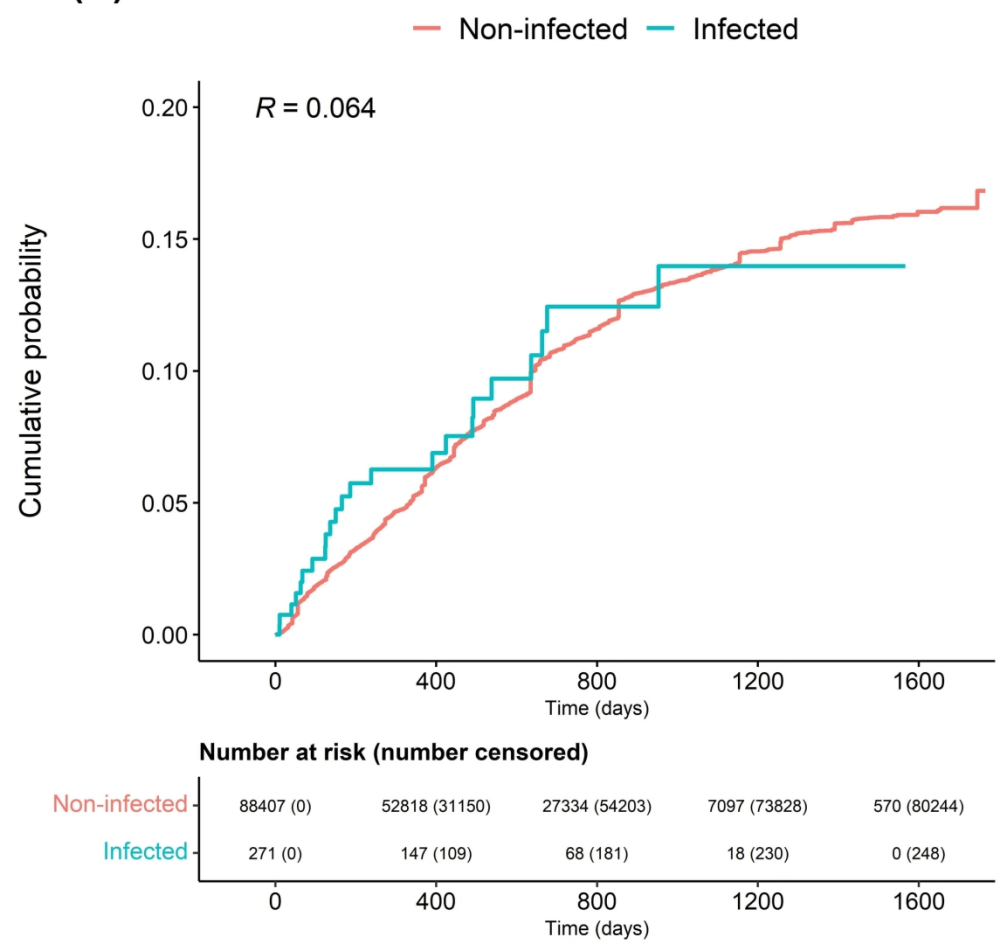

Figure 3. Kaplan–Meier estimates for cardiovascular events in Streptococcus pneumoniae-infected and non-infected patients  
(A) Coronary heart disease (CHD)

177x177mm (300 x 300 DPI)

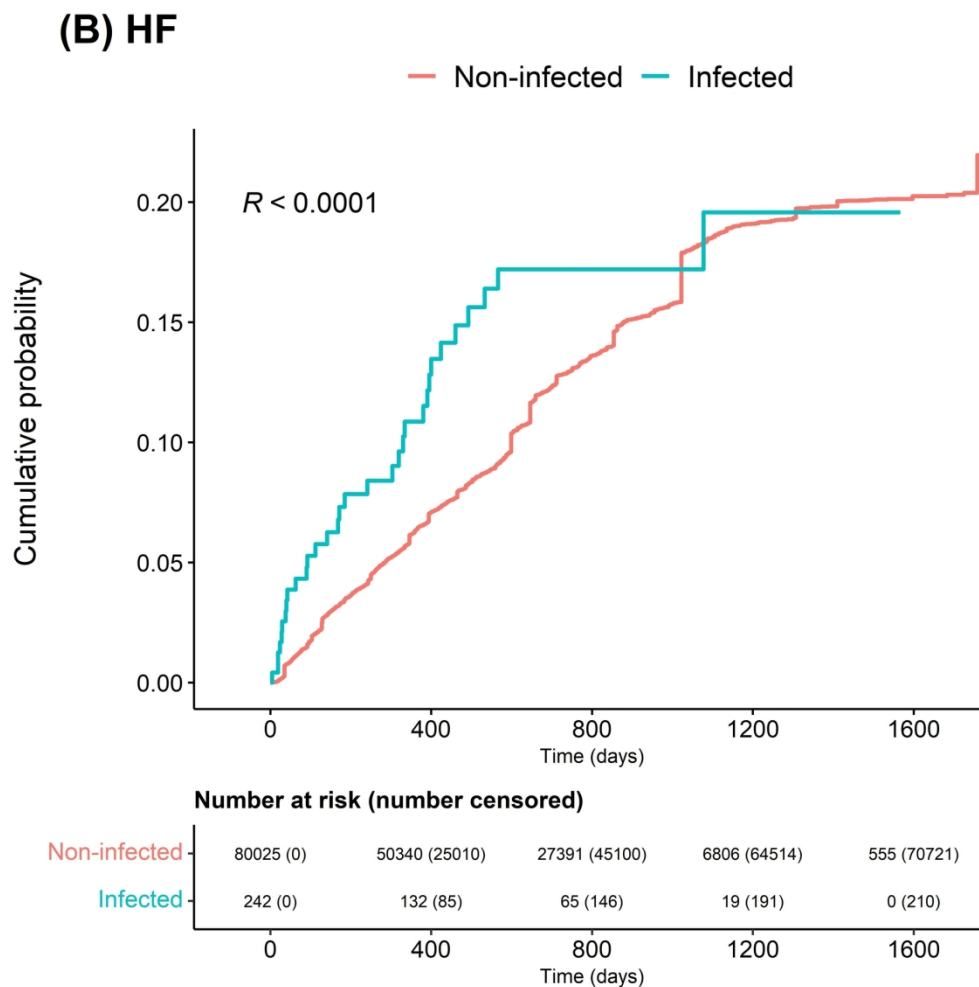

Figure 3. Kaplan–Meier estimates for cardiovascular events in *Streptococcus pneumoniae*-infected and non-infected patients  
(B) heart failure (HF)

177x177mm (300 x 300 DPI)

**(C) Stroke**

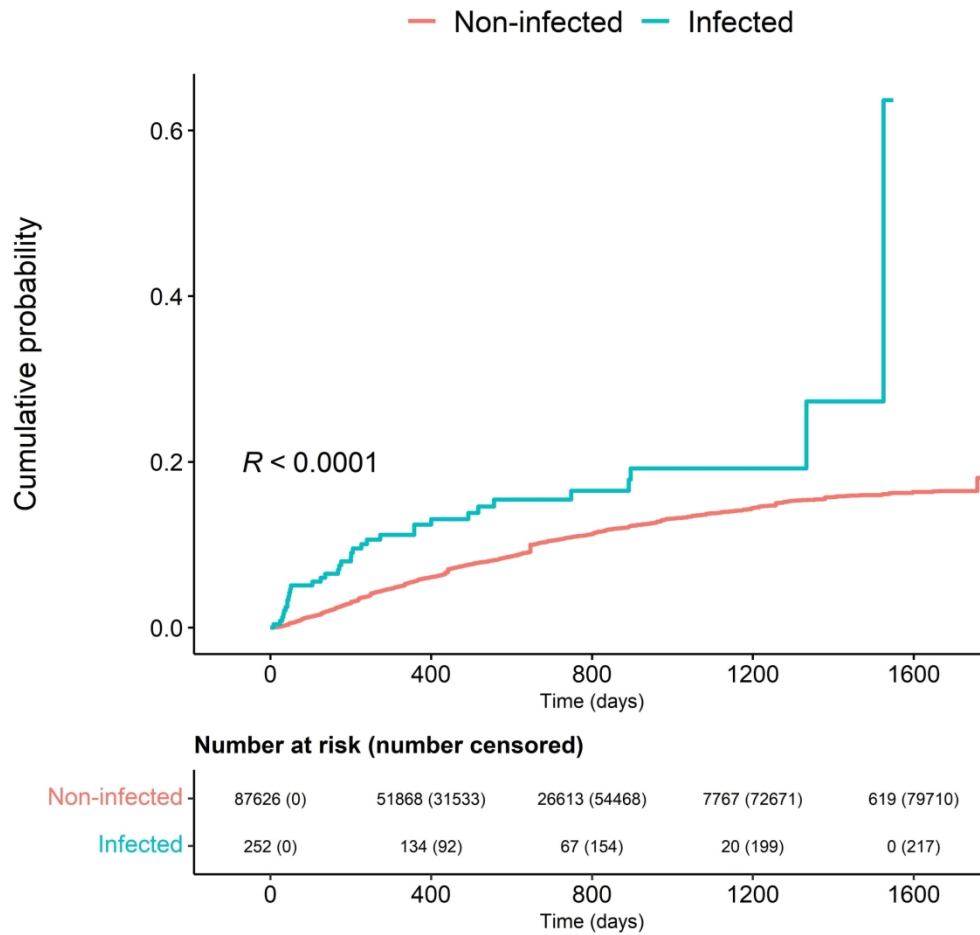

Figure 3. Kaplan–Meier estimates for cardiovascular events in *Streptococcus pneumoniae*-infected and non-infected patients  
(C) stroke

177x177mm (300 x 300 DPI)

**(D) Arrhythmia**

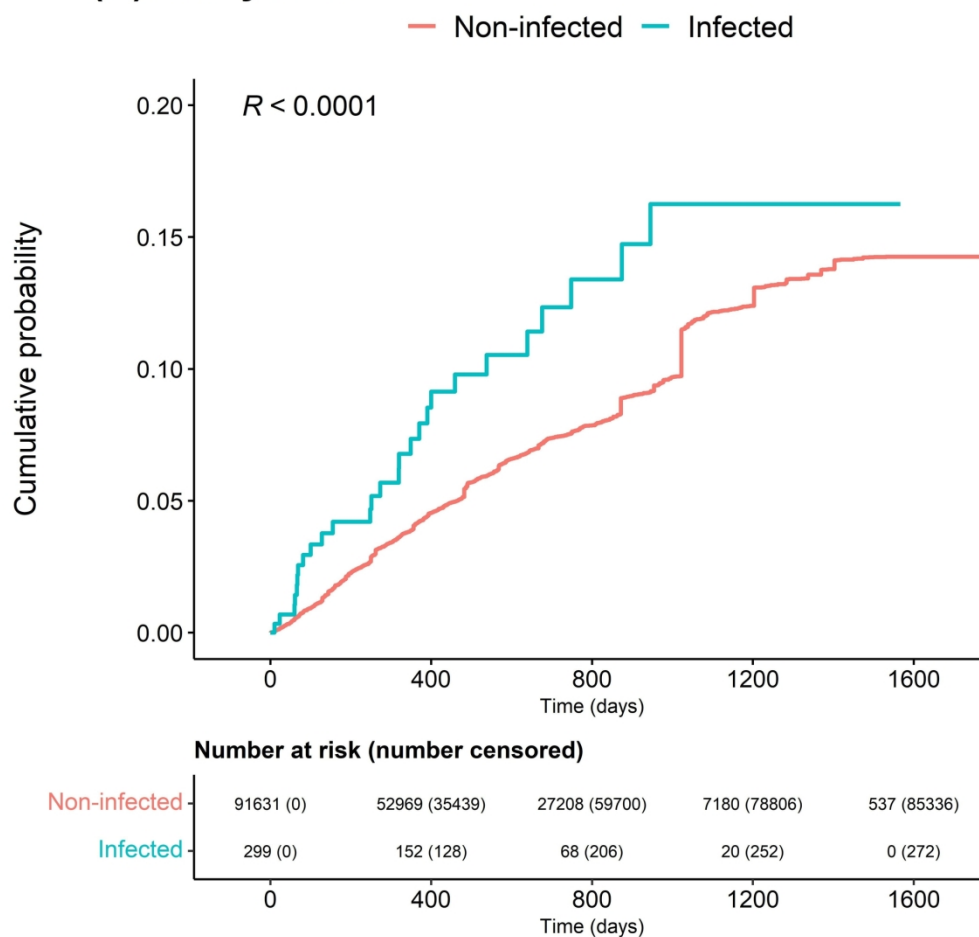

Figure 3. Kaplan–Meier estimates for cardiovascular events in *Streptococcus pneumoniae*-infected and non-infected patients (D) arrhythmia

177x177mm (300 x 300 DPI)



# BMJ Open

## Risk of cardiovascular events after *Streptococcus pneumoniae* infection: A retrospective cohort LIFE study

|                                 |                                                                                              |
|---------------------------------|----------------------------------------------------------------------------------------------|
| Journal:                        | <i>BMJ Open</i>                                                                              |
| Manuscript ID                   | bmjopen-2021-059713.R1                                                                       |
| Article Type:                   | Original research                                                                            |
| Date Submitted by the Author:   | 29-Jul-2022                                                                                  |
| Complete List of Authors:       | Nishimura, Naoaki; Kyushu University School of Medicine, Fukuda, Haruhisa; Kyushu University |
| <b>Primary Subject Heading</b>: | Cardiovascular medicine                                                                      |
| Secondary Subject Heading:      | Epidemiology, Health services research, Infectious diseases, Public health                   |
| Keywords:                       | Epidemiology < INFECTIOUS DISEASES, Cardiac Epidemiology < CARDIOLOGY, EPIDEMIOLOGY          |
|                                 |                                                                                              |

SCHOLARONE™  
Manuscripts



I, the Submitting Author has the right to grant and does grant on behalf of all authors of the Work (as defined in the below author licence), an exclusive licence and/or a non-exclusive licence for contributions from authors who are: i) UK Crown employees; ii) where BMJ has agreed a CC-BY licence shall apply, and/or iii) in accordance with the terms applicable for US Federal Government officers or employees acting as part of their official duties; on a worldwide, perpetual, irrevocable, royalty-free basis to BMJ Publishing Group Ltd ("BMJ") its licensees and where the relevant Journal is co-owned by BMJ to the co-owners of the Journal, to publish the Work in this journal and any other BMJ products and to exploit all rights, as set out in our [licence](#).

The Submitting Author accepts and understands that any supply made under these terms is made by BMJ to the Submitting Author unless you are acting as an employee on behalf of your employer or a postgraduate student of an affiliated institution which is paying any applicable article publishing charge ("APC") for Open Access articles. Where the Submitting Author wishes to make the Work available on an Open Access basis (and intends to pay the relevant APC), the terms of reuse of such Open Access shall be governed by a Creative Commons licence – details of these licences and which [Creative Commons](#) licence will apply to this Work are set out in our licence referred to above.

Other than as permitted in any relevant BMJ Author's Self Archiving Policies, I confirm this Work has not been accepted for publication elsewhere, is not being considered for publication elsewhere and does not duplicate material already published. I confirm all authors consent to publication of this Work and authorise the granting of this licence.

1  
2  
3  
4 1 ***BMJ Open***

5  
6  
7 2 **Risk of cardiovascular events after *Streptococcus pneumoniae* infection: A retrospective**  
8 3 **cohort LIFE study**

9  
10 4 Naoaki Nishimura<sup>1)</sup>, Haruhisa Fukuda<sup>2)\*</sup>

11 5  
12  
13 6 <sup>1)</sup> Kyushu University School of Medicine, Fukuoka, Kyushu, Japan

14 7 <sup>2)</sup> Kyushu University Graduate School of Medical Sciences, Fukuoka, Kyushu, Japan

15 8  
16 9 **\* Corresponding Author:**

17 10 Haruhisa Fukuda, MPH, PhD

18 11 Department of Health Care Administration and Management, Kyushu University Graduate School of  
19 12 Medical Sciences

20 13 3-1-1 Maidashi Higashi-ku Fukuoka 812-8582, Japan

21 14 Phone: +81-92-642-6956 Fax: +81-92-642-6961

22 15 Email address: fukuda.haruhisa.977@m.kyushu-u.ac.jp

1  
2  
3 31 **Abstract**

4 32 **Objectives:** To elucidate the risk of cardiovascular event occurrence following *Streptococcus*  
5 33 *pneumoniae* infection.

6 34 **Design:** Retrospective cohort study using a LIFE Study database.

7 35 **Setting:** Three municipalities in Japan.

8 36 **Participants:** Municipality residents who were enrolled in either National Health Insurance  
9 37 or the Latter-Stage Elderly Healthcare System from April 2014 to March 2020.

10 38 **Exposure:** Occurrence of *S. pneumoniae* infection.

11 39 **Primary Outcome Measures:** Occurrence of one of the following cardiovascular events that  
12 40 led to hospitalization after *S. pneumoniae* infection: (1) coronary heart disease (CHD), (2)  
13 41 heart failure (HF), (3) stroke, or (4) atrial fibrillation (AF).

14 42 **Results:** *S. pneumoniae*-infected patients were matched with non-infected patients for each  
15 43 cardiovascular event. We matched 209 infected patients and 43,499 non-infected patients for  
16 44 CHD, 179 infected patients and 44,148 non-infected patients for HF, 221 infected patients and  
17 45 44,768 non-infected patients for stroke, and 241 infected patients and 39,568 non-infected  
18 46 patients for AF. During follow-up, the incidence rates for the matched infected and non-  
19 47 infected patients were, respectively, 38.6 (95% confidence interval: 19.9–67.3) and 30.4  
20 48 (29.1–31.8) per 1000 person-years for CHD; 69.6 (41.9–108.8) and 50.5 (48.9–52.2) per 1000  
21 49 person-years for HF; 75.4 (48.3–112.2) and 35.5 (34.1–36.9) per 1000 person-years for  
22 50 stroke; and 34.7 (17.9–60.6) and 11.2 (10.4–12.0) per 1000 person-years for AF. Infected  
23 51 patients were significantly more likely to develop stroke (adjusted hazard ratio: 2.05, 95%  
24 52 confidence interval: 1.22–3.47; adjusted subdistribution hazard ratio: 1.94, 95% confidence  
25 53 interval: 1.15–3.26) and AF (3.29, 1.49–7.26; 2.74, 1.24–6.05) than their non-infected  
26 54 counterparts.

27 55 **Conclusions:** *S. pneumoniae* infections elevate the risk of subsequent stroke and AF  
28 56 occurrence. These findings indicate that pneumococcal infections not only have short-term  
29 57 effects on patients' health, but also increase their mid-to long-term susceptibility to serious  
30 58 cardiovascular events.

31 59  
32 60

1  
2  
3  
4 60 **Article Summary (Strengths and Limitations of this study)**

- 5 61 • This study comparatively examined both *Streptococcus pneumoniae*-infected patients and non-  
6 62 infected controls to elucidate the association between pneumococcal infections and subsequent  
7 63 cardiovascular events.  
8  
9 64 • While prior studies mostly focused on short-term outcomes, our study period spanned from April 2014  
10 65 to March 2020 to examine the mid-to long-term risks of cardiovascular events following  
11 66 pneumococcal infection.  
12  
13 67 • Despite a relatively large study sample and long study period, *S. pneumoniae* infections and  
14 68 cardiovascular events were identified using only diagnosis codes in the claims data.  
15  
16 69 • Our study did not account for patients' lifestyle factors (e.g., tobacco and alcohol consumption),  
17 70 socioeconomic factors, or pneumococcal vaccination statuses.  
18  
19  
20 71

## 72 Introduction

73 Community-acquired pneumonia is a major infectious disease that frequently leads to  
74 hospitalization, and exhibits high morbidity and mortality rates across numerous countries [1,  
75 2]. *Streptococcus pneumoniae* is the causal pathogen for a large proportion of pneumonia  
76 cases that require hospital-based care [3]. As older persons are more susceptible to  
77 pneumococcal pneumonia [4], this condition represents a particularly serious public health  
78 problem in countries with aging populations. In addition to its acute effects, pneumonia is also  
79 known to increase the mid-to long-term health risks of infected patients, thereby placing a  
80 heavy clinical and economic burden on patients and society [2, 5].

81 Previous cohort studies have reported that pneumonia is associated with an increased  
82 risk of the following conditions: overall cardiac events [6-14], acute coronary syndrome [6, 8,  
83 9, 11, 12, 14-17], heart failure (HF) [6, 9-14, 16, 18], atrial fibrillation (AF) [6, 8-14, 16, 17,  
84 19, 20], and stroke [11, 12, 17]. However, the majority of these studies focused on pneumonia  
85 patients without comparisons with non-infected controls, and generally used relatively short  
86 follow-up periods. Furthermore, only a few studies in the existing literature have explored the  
87 effects of pneumonia on subsequent cardiovascular disease [7, 18, 21].

88 In order to accurately evaluate the impact of *S. pneumoniae* infection on subsequent  
89 cardiovascular disease, there is a need for long-term cohort studies that compare infected  
90 patients with matched non-infected controls. This study aimed to elucidate the risk of  
91 cardiovascular event occurrence following *S. pneumoniae* infection using administrative  
92 claims data acquired from infected and non-infected patients in 3 Japanese municipalities. The  
93 study also examined if these risks differ among age groups.

## 95 Methods

### 96 Study data

97 Data were provided by the Longevity Improvement & Fair Evidence (LIFE) Study, which is  
98 managed by Kyushu University (Fukuoka, Japan) [22]. In the LIFE Study, participating  
99 municipalities voluntarily provide administrative claims data for research purposes. These  
100 claims data are acquired from the municipalities' residents who are enrolled in either National  
101 Health Insurance or the Latter-Stage Elderly Healthcare System, and encompass information  
102 on patient characteristics and reimbursement claims for all insurance-covered healthcare  
103 provided in the inpatient and outpatient settings. Enrollees in National Health Insurance  
104 include the self-employed, agricultural and fishery workers, part-time workers, retirees, and  
105 their dependents. Enrollees in the Latter-Stage Elderly Healthcare System include residents  
106 aged  $\geq 75$  years. The number of municipalities participating in the LIFE Study varies over  
107 time owing to differences in agreement contracts, with the earliest participant providing data

1  
2  
3 108 from April 2014. The majority of the participating municipalities provide data from April  
4 109 2015 onward. As of 2021, the LIFE Study is able to conduct longitudinal studies with 5-year  
5 110 follow-up periods.

6  
7  
8 111 For this study, claims data from April 2014 to March 2020 were acquired from  
9 112 insurance enrollees who were residing in 3 municipalities (residential populations: 58,000,  
10 113 121,600, and 305,200) in Fukuoka Prefecture. The claims datasets contained records of  
11 114 diagnoses (Japanese diagnosis codes and International Classification of Diseases, 10th  
12 115 revision [ICD-10] codes), dates of treatments and admissions, and coexisting conditions  
13 116 (Charlson Comorbidity Index scores). Charlson Comorbidity Index scores were generated  
14 117 from ICD-10 codes recorded in both inpatient and outpatient claims.  
15  
16  
17  
18  
19  
20

### 21 119 *Study subjects*

22  
23 120 First, patients with *S. pneumoniae* infections were identified through combinations of ICD-10  
24 121 codes and/or Japanese diagnosis codes developed by the Ministry of Health, Labour and  
25 122 Welfare. We used the combinations of codes proposed by Imai et al. [23]. In this study, we  
26 123 considered all types of *S. pneumoniae* infections, including invasive pneumococcal diseases.  
27 124 The occurrence of subsequent cardiovascular events (coronary heart disease [CHD], HF,  
28 125 stroke, and AF) was identified using ICD-10 codes. We excluded patients with records of  
29 126 previous in-hospital cardiovascular events from their earliest recorded dates within the  
30 127 observation period until *S. pneumoniae* infection, patients with records of cardiovascular  
31 128 events during the index hospitalization for *S. pneumoniae* infection, and patients without any  
32 129 claims data  $\geq 12$  months before *S. pneumoniae* infection.

33  
34  
35 130 Next, we set each infected patient's index date as the last day of the month containing  
36 131 a recorded *S. pneumoniae* infection. The infected patients were then matched with a cohort of  
37 132 non-infected patients according to age (within 5 years), sex, Charlson Comorbidity Index  
38 133 score, and hospitalization at the index date using sampling without replacement. Using the  
39 134 method proposed by Quan et al. [24], Charlson Comorbidity Index scores were calculated  
40 135 based on the following conditions: myocardial infarction, congestive HF, peripheral vascular  
41 136 disease, cerebrovascular disease, dementia, chronic pulmonary disease, rheumatic disease,  
42 137 peptic ulcer disease, liver disease, diabetes with/without chronic complications, hemiplegia or  
43 138 paraplegia, malignancy, metastatic solid tumor, and HIV/AIDS. When examining the  
44 139 occurrence of AF after *S. pneumoniae* infection, we included the comorbidity of AF as a  
45 140 matching criterion. Infected patients who could not be matched with non-infected patients  
46 141 were excluded. The index date for each non-infected patient was set as the same date as  
47 142 his/her matched infected case. Each patient's Charlson Comorbidity Index score was  
48 143 calculated using claims data for 30 days before the index date. We also excluded non-infected  
49  
50  
51  
52  
53  
54  
55  
56  
57  
58  
59  
60

1  
2  
3 144 patients who had experienced cardiovascular events that led to hospitalization before their  
4 index dates.  
5 145  
6 146

### 8 147 *Outcome measure*

10  
11 148 The outcome measure was the occurrence of a cardiovascular event that led to hospitalization  
12 149 after the *S. pneumoniae* infection date. Among inpatients, the infection date was set as the  
13 150 first date of admission for the in-hospital treatment of an *S. pneumoniae* infection. Among  
14 151 outpatients, the infection date was set as the first date of any medical treatment with a  
15 152 diagnosis code indicating an *S. pneumoniae* infection. We focused on the first infection  
16 153 episode for patients who had multiple infection episodes during the observation period.

17 154 Next, we examined the subsequent occurrence of each of the following 4  
18 155 cardiovascular events that led to hospitalization: (1) CHD (ICD-10 codes: I20-25), (2) HF  
19 156 (I50), (3) stroke (I61-63, 65-66), and (4) AF (I48). The occurrence date of each cardiovascular  
20 157 event was set as the date of admission for the in-hospital treatment of that event.

21 158 Patients who had died during the observation period without developing any  
22 159 cardiovascular event were followed-up until the last date of medical treatments in the claims  
23 160 data. Patients who had died during the observation period after developing a cardiovascular  
24 161 event were followed-up until the date of the cardiovascular event occurrence. All survivors  
25 162 were followed-up until the end of their municipality's observation period. The ends of the  
26 163 observation periods ranged from September 2019 to March 2020 among the municipalities.

27 164 **Figure 1** shows an overview of the follow-up process.  
28 165

### 29 166 *Statistical analysis*

30 167 Our analysis was designed to examine the possible effects of *S. pneumoniae* infection on the  
31 168 subsequent occurrence of cardiovascular events, and to determine if these effects differed  
32 169 among age groups. For each of the 4 target cardiovascular events, we calculated the number  
33 170 of events for the infected group and non-infected group during the observation period, and  
34 171 estimated the incidence rates per 1000 person-years. Cox proportional hazards models were  
35 172 constructed to estimate the hazard ratio (HRs) and 95% confidence interval (CIs) of each  
36 173 cardiovascular event in the infected group relative to the non-infected group. Subdistribution  
37 174 HRs were also estimated with Cox proportional hazards models using the Fine–Gray  
38 175 competing risk approach in which death was regarded as a competing event. The Kaplan–  
39 176 Meier method was used to calculate the cumulative probability of cardiovascular event  
40 177 occurrence in the 2 groups. In addition, we analyzed the patients stratified according to the  
41 178 following age groups: 0–49 years, 50–64 years, and  $\geq 65$  years.



1  
2  
3 179 All statistical analyses were performed using R (version 4.1.0) and R Studio (version  
4 180 1.4.1106) software. Two-tailed *P* values below 0.05 were considered statistically significant.  
5  
6 181  
7

### 8 182 *Patient and public involvement*

9  
10 183 Patients and/or the public were not involved in the design, conduct, reporting, or dissemination plans  
11  
12 184 of this research.  
13  
14 185

## 16 186 **Results**

17  
18 187 We first identified 698 *S. pneumoniae*-infected patients and 253,302 non-infected patients  
19  
20 188 between April 1, 2014 and March 31, 2020 (**Figure 2**). After applying the exclusion criteria,  
21 189 489 eligible infected patients were included in the analysis. There were 22 invasive  
22  
23 190 pneumococcal disease cases (4.5%) and 467 non-invasive pneumococcal disease cases  
24 191 (95.5%). Among the infected patients that could be successfully matched with non-infected  
25 192 patients for each cardiovascular event, we identified 209 infected patients without prior CHD,  
26 193 179 infected patients without prior HF, 221 infected patients without prior stroke, and 241  
27 194 infected patients without prior AF. Using the various matching criteria, we matched 43,499,  
28  
29 195 44,148, 44,768, and 39,568 non-infected controls with the infected patients for CHD, HF,  
30 196 stroke, and AF, respectively. The non-infected patients were followed-up from the first *S.*  
31  
32 197 *pneumoniae* infection date of their matched infected patients. **Table 1** shows the  
33 198 characteristics and comorbidities of the infected and non-infected patients.  
34  
35  
36  
37  
38  
39  
40  
41  
42  
43  
44  
45  
46  
47  
48  
49  
50  
51  
52  
53  
54  
55  
56  
57  
58  
59  
60

199 **Table 1. Characteristics and comorbidities of *Streptococcus pneumoniae*-infected and non-infected patients**

|                                        | CHD          |           | HF           |           | Stroke       |           | AF           |           |
|----------------------------------------|--------------|-----------|--------------|-----------|--------------|-----------|--------------|-----------|
|                                        | Non-infected | Infected  | Non-infected | Infected  | Non-infected | Infected  | Non-infected | Infected  |
| N                                      | 43,499       | 209       | 44,148       | 179       | 44,768       | 221       | 39,568       | 241       |
| Cardiovascular event incidence         | 2,090 (4.8%) | 12 (5.7%) | 3,790 (8.6%) | 19 (11%)  | 2,502 (5.6%) | 24 (11%)  | 703 (1.8%)   | 12 (5.0%) |
| Age, mean (y)                          | 77.0         | 77.1      | 75.4         | 75.6      | 77.5         | 77.7      | 77.5         | 77.7      |
| Men                                    | 22,062 (51%) | 106 (51%) | 24,417 (55%) | 99 (55%)  | 22,890 (51%) | 113 (51%) | 20,523 (52%) | 125 (52%) |
| Women                                  | 21,437 (49%) | 103 (49%) | 19,731 (45%) | 80 (45%)  | 21,878 (49%) | 108 (49%) | 19,045 (48%) | 116 (48%) |
| Hospital admission                     | 30,595 (70%) | 147 (70%) | 29,103 (66%) | 118 (66%) | 31,804 (71%) | 157 (71%) | 29,224 (74%) | 178 (74%) |
| Myocardial infarction                  | 0 (0%)       | 0 (0%)    | 247 (0.6%)   | 1 (0.6%)  | 203 (0.5%)   | 1 (0.5%)  | 164 (0.4%)   | 1 (0.4%)  |
| Congestive heart failure               | 4,787 (11%)  | 23 (11%)  | 987 (2.2%)   | 4 (2.2%)  | 4,051 (9.0%) | 20 (9.0%) | 4,433 (11%)  | 27 (11%)  |
| Peripheral vascular disease            | 1,249 (2.9%) | 6 (2.9%)  | 1,233 (2.8%) | 5 (2.8%)  | 1,418 (3.2%) | 7 (3.2%)  | 1,149 (2.9%) | 7 (2.9%)  |
| Cerebrovascular disease                | 6,036 (14%)  | 29 (14%)  | 5,179 (12%)  | 21 (12%)  | 4,254 (9.5%) | 21 (9.5%) | 5,254 (13%)  | 32 (13%)  |
| Dementia                               | 6,244 (14%)  | 30 (14%)  | 4,933 (11%)  | 20 (11%)  | 5,267 (12%)  | 26 (12%)  | 4,761 (12%)  | 29 (12%)  |
| Chronic pulmonary disease              | 12,488 (29%) | 60 (29%)  | 14,305 (32%) | 58 (32%)  | 12,762 (29%) | 63 (29%)  | 11,000 (28%) | 67 (28%)  |
| Rheumatic disease                      | 624 (1.4%)   | 3 (1.4%)  | 1,233 (2.8%) | 5 (2.8%)  | 810 (1.8%)   | 4 (1.8%)  | 985 (2.5%)   | 6 (2.5%)  |
| Peptic ulcer disease                   | 2,914 (6.7%) | 14 (6.7%) | 3,453 (7.8%) | 14 (7.8%) | 2,633 (5.9%) | 13 (5.9%) | 2,134 (5.4%) | 13 (5.4%) |
| Mild liver disease                     | 6,868 (16%)  | 33 (16%)  | 7,399 (17%)  | 30 (17%)  | 6,685 (15%)  | 33 (15%)  | 4,925 (12%)  | 30 (12%)  |
| Diabetes without chronic complications | 624 (1.4%)   | 3 (1.4%)  | 493 (1.1%)   | 2 (1.1%)  | 405 (0.9%)   | 2 (0.9%)  | 328 (0.8%)   | 2 (0.8%)  |
| Diabetes with chronic complications    | 1,249 (2.9%) | 6 (2.9%)  | 1,726 (3.9%) | 7 (3.9%)  | 1,215 (2.7%) | 6 (2.7%)  | 1,149 (2.9%) | 7 (2.9%)  |
| Hemiplegia or paraplegia               | 0 (0%)       | 0 (0%)    | 0 (0%)       | 0 (0%)    | 0 (0%)       | 0 (0%)    | 0 (0%)       | 0 (0%)    |
| Renal disease                          | 416 (1.0%)   | 2 (1.0%)  | 493 (1.1%)   | 2 (1.1%)  | 810 (1.8%)   | 4 (1.8%)  | 657 (1.7%)   | 4 (1.7%)  |
| Malignancy                             | 3,538 (8.1%) | 17 (8.1%) | 4,686 (11%)  | 19 (11%)  | 4,051 (9.0%) | 20 (9.0%) | 3,284 (8.3%) | 20 (8.3%) |
| Moderate or severe liver disease       | 0 (0%)       | 0 (0%)    | 0 (0%)       | 0 (0%)    | 0 (0%)       | 0 (0%)    | 0 (0%)       | 0 (0%)    |
| Metastatic solid tumor                 | 833 (1.9%)   | 4 (1.9%)  | 987 (2.2%)   | 4 (2.2%)  | 608 (1.4%)   | 3 (1.4%)  | 657 (1.7%)   | 4 (1.7%)  |
| HIV/AIDS                               | 0 (0%)       | 0 (0%)    | 0 (0%)       | 0 (0%)    | 0 (0%)       | 0 (0%)    | 0 (0%)       | 0 (0%)    |
| AF                                     |              |           |              |           |              |           | 328 (0.8%)   | 2 (0.8%)  |

200 Values are presented as number (percentage) unless stated otherwise. Abbreviations: CHD, coronary heart disease; HF, heart failure; AF, atrial fibrillation.

1  
2  
3 201 **Table 2** summarizes the risk of each cardiovascular event after *S. pneumoniae*  
4 202 infection. The observation periods of the matched infected and non-infected patients  
5 203 (weighted by the proportion of the infected patients) were, respectively, 311 and 68,706  
6 204 person-years for CHD; 273 and 74,999 person-years for HF; 318 and 70,454 person-years for  
7 205 stroke; and 346 and 62,986 person-years for AF. The median observation periods of the  
8 206 matched infected and non-infected patients were 823 days for CHD, 827 days for HF, 820  
9 207 days for stroke, and 797 days for AF. During follow-up, the incidence rates for the infected  
10 208 and non-infected patients were, respectively, 38.6 (95% CI: 19.9–67.3) and 30.4 (95% CI:  
11 209 29.1–31.8) per 1000 person-years for CHD; 69.6 (41.9–108.8) and 50.5 (48.9–52.2) per 1000  
12 210 person-years for HF; 75.4 (48.3–112.2) and 35.5 (34.1–36.9) per 1000 person-years for  
13 211 stroke; and 34.7 (17.9–60.6) and 11.2 (10.4–12.0) per 1000 person-years for AF. The  
14 212 unadjusted HRs for cardiovascular event occurrence in infected patients (relative to non-  
15 213 infected patients) were 1.27 (95% CI: 0.72–2.24) for CHD, 1.38 (0.88–2.16) for HF, 2.12  
16 214 (1.42–3.17) for stroke, and 3.11 (1.76–5.50) for AF. After adjusting for age, sex, Charlson  
17 215 Comorbidity Index score, and coexisting AF (only for the outcome of AF), infected patients  
18 216 were significantly more likely to develop stroke (adjusted HR: 2.05, 95% CI:1.22–3.47) and  
19 217 AF (adjusted HR: 3.29, 95% CI: 1.49–7.26) than their non-infected counterparts. When death  
20 218 was regard as a competing event, infected patients were still significantly more likely to  
21 219 develop stroke (adjusted subdistribution HR: 1.94, 95% CI: 1.15–3.26) and AF (2.74, 1.24–  
22 220 6.05) than their non-infected counterparts.

221 **Table 2. Cardiovascular events in *Streptococcus pneumoniae*-infected and non-infected patients**

|                                                             | CHD              |                   | HF               |                   | Stroke           |                   | AF               |                   |
|-------------------------------------------------------------|------------------|-------------------|------------------|-------------------|------------------|-------------------|------------------|-------------------|
|                                                             | Non-infected     | Infected          | Non-infected     | Infected          | Non-infected     | Infected          | Non-infected     | Infected          |
| Overall                                                     |                  |                   |                  |                   |                  |                   |                  |                   |
| N                                                           | 43,499           | 209               | 44,148           | 179               | 44,768           | 221               | 39,568           | 241               |
| Incidence, n (%)                                            | 2,090 (4.8%)     | 12 (5.7%)         | 3,790 (8.6%)     | 19 (11%)          | 2,502 (5.6%)     | 24 (11%)          | 703 (1.8%)       | 12 (5.0%)         |
| Person-years of follow-up                                   | 68,706           | 311               | 74,999           | 273               | 70,454           | 318               | 62,986           | 346               |
| Incidence rate per 1000 person-years (95% CI)               | 30.4 (29.1-31.8) | 38.6 (19.9-67.3)  | 50.5 (48.9-52.2) | 69.6 (41.9-108.8) | 35.5 (34.1-36.9) | 75.4 (48.3-112.2) | 11.2 (10.4-12.0) | 34.7 (17.9-60.6)  |
| Unadjusted hazard ratio (95% CI)                            | -                | 1.27 (0.72-2.24)  | -                | 1.38 (0.88-2.16)  | -                | 2.12 (1.42-3.17)  | -                | 3.11 (1.76-5.50)  |
| Adjusted hazard ratio <sup>a</sup> (95% CI)                 | -                | 1.20 (0.60-2.39)  | -                | 1.18 (0.58-2.37)  | -                | 2.05 (1.22-3.47)  | -                | 3.29 (1.49-7.26)  |
| Adjusted subdistribution hazard ratio <sup>a</sup> (95% CI) | -                | 1.19 (0.63-2.26)  | -                | 1.13 (0.60-2.13)  | -                | 1.94 (1.15-3.26)  | -                | 2.74 (1.24-6.05)  |
| By age group                                                |                  |                   |                  |                   |                  |                   |                  |                   |
| N (%)                                                       |                  |                   |                  |                   |                  |                   |                  |                   |
| 0-49 years                                                  | 1,958 (4.5%)     | 9 (4.3%)          | 2,304 (5.2%)     | 9 (5.0%)          | 1,895 (4.2%)     | 9 (4.1%)          | 1,533 (3.9%)     | 9 (3.7%)          |
| 50-64 years                                                 | 3,963 (9.1%)     | 21 (10%)          | 4,080 (9.2%)     | 18 (10%)          | 3,620 (8.1%)     | 19 (8.6%)         | 3,305 (8.4%)     | 22 (9.1%)         |
| ≥65 years                                                   | 37,578 (86%)     | 179 (86%)         | 37,765 (86%)     | 152 (85%)         | 39,253 (88%)     | 193 (87%)         | 34,730 (88%)     | 210 (87%)         |
| Incidence rate per 1000 person-years (95% CI)               |                  |                   |                  |                   |                  |                   |                  |                   |
| 0-49 years                                                  | 8.0 (5.6-11.0)   | 0 (0-200.4)       | 15.0 (11.8-18.7) | 0 (0-200.4)       | 3.0 (1.6-5.1)    | 0 (0-200.4)       | 1.2 (0.3-3.0)    | 0 (0-200.4)       |
| 50-64 years                                                 | 5.4 (4.0-7.0)    | 21.8 (0.6-121.5)  | 29.4 (26.1-33.1) | 24.3 (0.6-135.1)  | 35.1 (31.3-39.3) | 69.7 (14.4-203.6) | 6.2 (4.6-8.2)    | 21.4 (0.5-119.2)  |
| ≥65 years                                                   | 36.7 (35.1-38.3) | 44.5 (22.2-79.7)  | 57.1 (55.2-59.0) | 84.4 (50.0-133.4) | 38.0 (36.5-39.7) | 81.8 (50.6-125.0) | 12.6 (11.7-13.6) | 39.2 (19.6-70.1)  |
| Adjusted hazard ratio <sup>a</sup> (95% CI)                 |                  |                   |                  |                   |                  |                   |                  |                   |
| 0-49 years                                                  | -                | 0                 | -                | 0                 | -                | 0                 | -                | 0                 |
| 50-64 years                                                 | -                | 4.06 (0.56-29.38) | -                | 0.82 (0.12-5.86)  | -                | 1.98 (0.64-6.19)  | -                | 3.47 (0.48-25.02) |
| ≥65 years                                                   | -                | 1.21 (0.64-2.10)  | -                | 1.48 (0.78-1.97)  | -                | 2.15 (1.29-3.04)  | -                | 3.11 (1.58-5.20)  |

222 <sup>a</sup> Adjusted for age, sex, Charlson Comorbidity Index score, and coexisting AF (only for the outcome of AF).

223 Abbreviations: CHD, coronary heart disease; HF, heart failure; AF, atrial fibrillation; CI, confidence interval

1  
2  
3 224 In the age-stratified analysis, *S. pneumonia* infections were not significantly associated  
4 225 with a higher risk of the 4 cardiovascular events in patients aged 50–64 years. Among older  
5 226 patients aged  $\geq 65$  years, *S. pneumonia* infections were significantly associated with  
6 227 substantially higher risks of stroke and AF occurrence.

9 228 **Figure 3** presents the Kaplan–Meier curves of each cardiovascular event. When  
10 229 compared with non-infected patients, infected patients had a significantly higher risk of  
11 230 incident HF, stroke, and AF (all  $P < 0.0001$ ); but not CHD ( $P = 0.046$ ).

14 231 **Figure 4** presents the cumulative incidence curves for cardiovascular events where  
15 232 death was regarded as a competing event.

### 18 233 Discussion

19 234 Through an analysis of National Health Insurance and Latter-Stage Elderly Healthcare  
20 235 System enrollees residing in 3 Japanese municipalities, this study comparatively examined the  
21 236 incidence of cardiovascular events between *S. pneumoniae*-infected patients and non-infected  
22 237 patients. Our results showed that the experience of *S. pneumoniae* infection significantly  
23 238 elevates the risk of subsequent stroke and AF. *S. pneumoniae* infection increased the risk of  
24 239 these cardiovascular events among older patients aged  $\geq 65$  years. While *S. pneumonia*  
25 240 infections were not significantly associated with a higher risk of these cardiovascular events  
26 241 in patients aged 50–64 years, the ratios were relatively high and more studies should be  
27 242 conducted. These findings may help to identify at-risk targets for expanded pneumococcal  
28 243 vaccination programs.

34 244 Recent studies have shown that patients with community-acquired pneumonia have a  
35 245 higher frequency of cardiovascular events [8, 10, 11, 16, 18, 21, 25, 26]. Our estimated  
36 246 incidence of AF after *S. pneumoniae* infection was 5.0%. The incidence of arrhythmia (ICD-  
37 247 10 codes: I47-49) in this study was estimated to be 9.0%, which is slightly higher than that of  
38 248 a previous meta-analysis that estimated an overall incidence of 7.2% among inpatients with  
39 249 community-acquired pneumonia [25]. This discrepancy may be explained by the fact that the  
40 250 meta-analysis had only included studies with short-term outcomes.

45 251 In our analysis, the estimated incidence of stroke after *S. pneumoniae* infection was  
46 252 considerably higher than those found in previous studies [11,16]. Perry et al. reported a stroke  
47 253 incidence of 0.17% in 40,979 patients during 90 days of admission for pneumonia, whereas  
48 254 Violi et al. reported a stroke incidence of 1.0% in 1,182 patients hospitalized for community-  
49 255 acquired pneumonia during in-hospital follow-up (median length of hospital stay: 11 days).  
50 256 Accordingly, those 2 studies had focused on the short-term incidence of stroke. However, the  
51 257 risk of stroke increases with age, and longer follow-up periods after *S. pneumoniae* infection  
52 258 would therefore provide a more accurate depiction of its risks. Furthermore, Perry et al. used  
53 259 ICD-9 codes to identify stroke, whereas Violi et al. identified stroke cases through clinical  
54 260 manifestations confirmed by computed tomography or magnetic resonance imaging [11,16].

1  
2  
3 261 Stroke diagnostic methods are generally reliant on imaging data, and many medical facilities  
4 262 in Japan are equipped with on-site computed tomography and/or magnetic resonance imaging  
5 263 scanners. This enables the accurate diagnosis of stroke, including cases of milder strokes,  
6  
7 264 throughout Japan.

9 265 Among the studies that reported a high frequency of subsequent cardiovascular events  
10 266 in pneumonia patients, few have actually compared infected patients with non-infected  
11 267 controls. Eurich et al. performed a long-term prospective cohort study of both inpatients and  
12 268 outpatients with community-acquired pneumonia, and found that these infections substantially  
13 269 increased the risk of HF across different age groups and disease severity [18]. During a  
14 270 median follow-up period of 9.9 years, 11.9% of patients with pneumonia developed incident  
15 271 HF compared with 7.4% of the non-infected controls; furthermore, 13.3% of patients with  
16 272 pneumococcal bacteremia developed incident HF [18]. In contrast, 13.0% of our infected  
17 273 patients developed incident HF compared with 12.0% of their non-infected counterparts, with  
18 274 no significant difference between the groups. This discrepancy may be influenced by the fact  
19 275 that Eurich et al. used a control group that only controlled for age (five-year age bands) and  
20 276 sex, only investigated outpatients in emergency departments, and focused on severe  
21 277 pneumonia infections. In contrast, our study included outpatients from all types of medical  
22 278 institutions, and our control group comprised patients without any *S. pneumoniae* infection.  
23 279 Our study also utilized a research design that differed from Eurich et al. [18], which only  
24 280 matched for age and sex, and adjusted for the effects for coexisting conditions by including  
25 281 them as covariates in analytical models. However, we matched infected patients and non-  
26 282 infected controls not only by age and sex, but also by coexisting conditions through Charlson  
27 283 Comorbidity Index scores.

28 284 To our knowledge, few studies have shown the long-term risks of subsequent stroke  
29 285 and AF after *S. pneumoniae* infection (including non-hospitalized cases) relative to non-  
30 286 infected controls. Severe cases of pneumonia require hospital-based care, especially among  
31 287 older adults. Therefore, studies that focus on hospitalized pneumonia patients would overlook  
32 288 the risks associated with less severe cases. For example, although patients aged  $\leq 65$  years  
33 289 may have milder *S. pneumoniae* infections and a correspondingly lower risk of hospitalization  
34 290 than older patients, these infections could still elevate the risk of subsequent cardiovascular  
35 291 events in the younger age groups. As this study used insurance claims data that incorporated  
36 292 both inpatient and outpatient data, we were able to identify the risk of cardiovascular events  
37 293 after *S. pneumoniae* infection in patients regardless of whether they required hospitalization.  
38 294 Moreover, our study excluded patients who had subsequent cardiovascular events during the  
39 295 index hospital stay for *S. pneumoniae* infection. For patients who were admitted to hospital  
40 296 due to *S. pneumoniae* infection, we only monitored for cardiovascular events that occurred  
41 297 after discharge. Most studies have reported the short-term risks of cardiovascular events

1  
2  
3 298 during or after acute infections, and the long-term impact of pneumonia on subsequent  
4 299 cardiovascular disease occurrence is less clear. Therefore, our study provides new insight into  
5 300 the mid-to long-term effects of milder *S. pneumoniae* infections treated in outpatient settings  
6 301 as well as severe *S. pneumoniae* infections that require hospitalization.

7  
8 302 A previous study identified the major causative organisms of community-acquired  
9 303 pneumonia to be *S. pneumoniae*, *Haemophilus influenzae*, *Mycoplasma pneumoniae*,  
10 304 *Chlamydophila pneumoniae*, *Legionella pneumophila*, *Staphylococcus aureus*, and several  
11 305 viral pathogens (including influenza A and B) [27]. *S. pneumoniae* reportedly reduces cardiac  
12 306 contractility by increasing cardiomyocyte uptake of bacterial cell wall antigens [28]. Many  
13 307 studies that seek to understand the pathogenesis of cardiovascular events following  
14 308 pneumonia focus on infections caused by *S. pneumoniae* [29]. Several studies have proposed  
15 309 that *S. pneumoniae* cell wall components and pneumolysin (a pore-forming toxin) trigger pro-  
16 310 inflammatory mechanisms that ultimately result in cardiac damage [30-33]. Furthermore, the  
17 311 infection-mediated hyperactivation of platelets can create a pro-inflammatory and  
18 312 prothrombotic environment that facilitates the occurrence of cardiovascular events and  
19 313 cardiac damage [31]. Pneumonia and other infections can trigger fever, hypoxia, and  
20 314 hemodynamic disturbance in patients, which are all risk factors of AF and its associated  
21 315 cardiac damage [34].

22  
23 316 The study limitations are as follows. First, *S. pneumoniae* infections and  
24 317 cardiovascular events were identified using diagnosis codes and ICD-10 codes, respectively.  
25 318 Therefore, our analysis may be vulnerable to coding errors. Second, our study could not  
26 319 account for patients' lifestyle factors (e.g., tobacco and alcohol consumption), socioeconomic  
27 320 factors, or pneumococcal vaccination statuses. In addition, we also could not account for  
28 321 differences in medications and treatments (especially at discharge) among the patients. Third,  
29 322 our study population was limited to enrollees of Japan's National Health Insurance and  
30 323 Latter-Stage Elderly Healthcare System, and the findings may not be extrapolatable to those  
31 324 enrolled in other insurance systems. Fourth, our study excluded patients with previous in-  
32 325 hospital cardiovascular events. However, the real-world population of patients would include  
33 326 those with such events. This approach could introduce selection bias and affect the  
34 327 comparability of our findings with real-world scenarios. Fifth, we excluded infected patients  
35 328 who were not matched with non-infected controls. With consideration to the relatively low  
36 329 number of infected patients, the exclusion of these non-matched patients could potentially  
37 330 reduce the power of our statistical analyses. Sixth, our study outcomes focused on  
38 331 cardiovascular events that resulted in hospitalization, and did not consider events without in-  
39 332 hospital care. Therefore, our study may overlook the impact of *S. pneumoniae* infection on  
40 333 subsequent occurrences of mild cardiovascular disease. Seventh, previous outpatient  
41 334 treatments were not included in the analysis, which could result in selection bias. Eighth, the

1  
2  
3 335 index date for matching was set as the last day of the month with *S. pneumoniae* infection  
4 336 instead of the claims date, which could result in lead-time bias. Finally, we did not consider  
5 337 the random effects of hospitals or municipalities in our multivariate analyses. Patients treated  
6 338 in the same hospital or municipality may be similar to one another. However, all the study  
7 339 municipalities were located in the same prefecture, and there were no major differences in  
8 340 characteristics at the regional or hospital level. Additionally, pneumonia is a common disease  
9 341 that hospitals regularly treat, and it is unlikely that there would be a large bias at the hospital  
10 342 level.  
11 343

### 17 344 *Conclusion*

19 345 *S. pneumoniae* infections elevate the risk of subsequent stroke and AF occurrence. These  
20 346 findings indicate that pneumococcal infections do not only have short-term effects on patient  
21 347 health, but also increase the mid-to long-term susceptibility to serious cardiovascular events.  
22 348 With a greater understanding of *S. pneumoniae* infection's far-reaching impact, further studies  
23 349 are needed to explore the possible benefits of expanding current pneumococcal vaccination  
24 350 programs.  
25 351

26 352  
27 353 **Contributors** NN and HF designed the study. HF provided the data. NN analyzed the data. NN  
28 354 prepared the first draft of the manuscript. HF made critical revisions to the manuscript. All authors  
29 355 reviewed and approved the final draft.

30 356 **Funding** The construction of the LIFE Study database was funded by a Grant-in-Aid for Scientific  
31 357 Research by the Japan Society for the Promotion of Science (Grant No. JP20H00563). Data analysis  
32 358 and publication were funded by an Investigator-Sponsored Research grant from Pfizer Japan Inc.

33 359 **Competing interest** HF received an Investigator-Sponsored Research grant from Pfizer Japan Inc.

34 360 **Ethical considerations** The study was approved by the Kyushu University Institutional Review  
35 361 Board for Clinical Research (Approval No. 2019-406).

36 362 **Patient consent for publications** Not required.

37 363 **Data availability statement** The data used in this study were acquired under agreements with the  
38 364 participating municipalities, which stipulate that the data can only be used by authorized research  
39 365 institutions and cannot be shared with third parties.  
40 366



368 **References**

- 369 1. Trotter CL, Stuart JM, George R, Miller E. Increasing hospital admissions for pneumonia, England. *Emerg Infect Dis* 2008; 14: 727–33
- 370 2. Eurich DT, Marrie TJ, Minhas-Sandhu JK, Majumdar SR. Ten-Year Mortality after Community-acquired  
371 Pneumonia. A Prospective Cohort. *Am J Respir Crit Care Med* 2015; 192: 597-604.
- 372 3. Musher DM. Streptococcus pneumoniae. In: Mandell GL, Bennett JE, Dolin R, eds. *Mandell, Douglass and  
373 Bennett's principles and practice of infectious diseases*. Philadelphia: Churchill Livingstone 2005: 2392–411
- 374 4. Fry AM, Shay DK, Holman RC, Curns AT, Anderson LJ. Trends in hospitalizations for pneumonia among  
375 persons aged 65 years or older in the United States, 1988–2002. *JAMA* 2005; 294: 2712–2719.
- 376 5. Jasti H, Mortensen EM, Obrosky DS, Kapoor WN, Fine MJ. Causes and risk factors for rehospitalization of  
377 patients hospitalized with community-acquired pneumonia. *Clin Infect Dis* 2008; 46: 550–6.
- 378 6. Postma DF, Spitoni C, Van Werkhoven CH, Van Elden LJR, Oosterheert JJ, Bonten MJM. Cardiac events  
379 after macrolides or fluoroquinolones in patients hospitalized for community-acquired pneumonia: Post-hoc  
380 analysis of a cluster-randomized trial. *BMC Infect Dis* 2019; 19: 17.
- 381 7. Corrales-Medina VF, Alvarez KN, Weissfeld LA, Angus DC, Chirinos JA, Chang CH, Newman A, Loehr L,  
382 Folsom AR, Elkind MS, et al. Association Between Hospitalization for Pneumonia and Subsequent Risk of  
383 Cardiovascular Disease. *JAMA* 2015; 313: 264–274.
- 384 8. Cangemi R, Calvieri C, Falcone M, et al. Relation of Cardiac Complications in the Early Phase of  
385 Community-Acquired Pneumonia to Long-Term Mortality and Cardiovascular Events. *Am J Cardiol* 2015;  
386 116: 647-651.
- 387 9. Griffin AT, Wiemken TL, Arnold FW. Risk factors for cardiovascular events in hospitalized patients with  
388 community-acquired pneumonia. *Int J Infect Dis* 2013; 17: e1125-e1129.
- 389 10. Corrales-Medina VF, Musher DM, Wells GA, Chirinos JA, Chen L, Fine MJ. Cardiac complications in  
390 patients with community-acquired pneumonia: incidence, timing, risk factors, and association with short-  
391 term mortality. *Circulation* 2012; 125: 773-781.
- 392 11. Violi F, Cangemi R, Falcone M, et al. Cardiovascular Complications and Short-term Mortality Risk in  
393 Community-Acquired Pneumonia. *Clin Infect Dis* 2017; 64: 1486-1493.
- 394 12. Aliberti S, Ramirez J, Cosentini R, et al. Acute myocardial infarction versus other cardiovascular events in  
395 community-acquired pneumonia. *ERJ Open Res* 2015; 1: 00020-2015
- 396 13. Viasus D, Garcia-Vidal C, Manresa F, Dorca J, Gudiol F, Carratalà J. Risk stratification and prognosis of  
397 acute cardiac events in hospitalized adults with community-acquired pneumonia. *J Infect* 2013; 66: 27-33.
- 398 14. Cilli A, Cakin O, Aksoy E, et al. Acute cardiac events in severe community-acquired pneumonia: A  
399 multicenter study. *Clin Respir J* 2018; 12: 2212-2219.
- 400 15. Chen PC, Liao WI, Wang YC, et al. An Elevated Glycemic Gap is Associated With Adverse Outcomes in  
401 Diabetic Patients With Community-Acquired Pneumonia. *Medicine* 2015; 94: e1456.
- 402 16. Perry TW, Pugh MJ, Waterer GW, et al. Incidence of cardiovascular events after hospital admission for  
403 pneumonia. *Am J Med* 2011; 124: 244-251.
- 404 17. Mandal P, Chalmers JD, Choudhury G, Akram AR, Hill AT. Vascular complications are associated with poor  
405 outcome in community-acquired pneumonia. *QJM* 2011; 104: 489-495.
- 406 18. Eurich DT, Marrie TJ, Minhas-Sandhu JK, Majumdar SR. Risk of heart failure after community acquired  
407 pneumonia: prospective controlled study with 10 years of follow-up. *BMJ* 2017; 356: j413.
- 408 19. Cangemi R, Calvieri C, Taliani G, et al. Left Atrium Dilatation and Left Ventricular Hypertrophy Predispose  
409 to Atrial Fibrillation in Patients With Community-Acquired Pneumonia. *Am J Cardiol* 2019; 124: 723-728.
- 410 20. Pieralli F, Biondo B, Vannucchi V, et al. Performance of the CHA2DS2-VASc score in predicting new onset  
411 atrial fibrillation during hospitalization for community-acquired pneumonia. *Eur J Intern Med* 2019; 62: 24-  
412 28.
- 413 21. Corrales-Medina VF, Serpa J, Rueda AM, et al. Acute bacterial pneumonia is associated with the occurrence  
414 of acute coronary syndromes. *Medicine*. 2009; 88: 154-159.
- 415 22. Fukuda H, Ishiguro C, Ono R, Kiyohara K. The Longevity Improvement & Fair Evidence (LIFE) Study:  
416 Overview of the Study Design and Baseline Participant Profile. *J Epidemiol* 2022; 10.2188
- 417 23. Imai K, Petigara T, Kohn MA, Nakashima K, Aoshima M, Shito A, Kanazu S. Risk of pneumococcal  
418 diseases in adults with underlying medical conditions: a retrospective, cohort study using two Japanese  
419 healthcare databases. *BMJ Open* 2018; 8: e018553.
- 420 24. Quan H, Li B, Couris CM, et al. Updating and validating the Charlson comorbidity index and score for risk  
421 adjustment in hospital discharge abstracts using data from 6 countries. *Am J Epidemiol* 2011; 173: 676-682.
- 422 25. Tralhão A, Póvoa P. Cardiovascular Events After Community-Acquired Pneumonia: A Global Perspective  
423 with Systematic Review and Meta-Analysis of Observational Studies. *J Clin Med* 2020; 9: 414.
- 424 26. Musher DM, Rueda AM, Kaka AS, Mapara SM. The association between pneumococcal pneumonia and  
425

- 1  
2  
3 426 acute cardiac events. *Clin Infect Dis* 2007; 45: 158-165.
- 4 427 27. Chong CP, Street PR. Pneumonia in the elderly: a review of the epidemiology, pathogenesis, microbiology,  
5 428 and clinical features. *South Med J* 2008; 101: 1141-1179.
- 6 429 28. Fillon S, Soulis K, Rajasekaran S, et al. Platelet-activating factor receptor and innate immunity: uptake of  
7 430 gram-positive bacterial cell wall into host cells and cell-specific pathophysiology. *J Immunol* 2006; 177:  
8 431 6182-6191.
- 9 432 29. Feldman C, Anderson R. Platelets and Their Role in the Pathogenesis of Cardiovascular Events in Patients  
10 433 With Community-Acquired Pneumonia. *Front Immunol* 2020; 11: 577303.
- 11 434 30. Feldman C, Normark S, Henriques-Normark B, Anderson R. Pathogenesis and prevention of risk of  
12 435 cardiovascular events in patients with pneumococcal community-acquired pneumonia. *J Intern Med* 2019;  
13 436 285: 635-652.
- 14 437 31. Anderson R, Nel JG, Feldman C. Multifaceted Role of Pneumolysin in the Pathogenesis of Myocardial Injury  
15 438 in Community-Acquired Pneumonia. *Int J Mol Sci* 2018; 19: 1147.
- 16 439 32. Shenoy AT, Beno SM, Brissac T, Bell JW, Novak L, Orihuela CJ. Severity and properties of cardiac damage  
17 440 caused by *Streptococcus pneumoniae* are strain dependent. *PLoS One* 2018; 13: e0204032.
- 18 441 33. Alhamdi Y, Neill DR, Abrams ST, et al. Circulating Pneumolysin Is a Potent Inducer of Cardiac Injury during  
19 442 Pneumococcal Infection. *PLoS Pathog* 2015; 11: e1004836.
- 20 443 34. Kirchhof P, Benussi S, Kotecha D, et al. 2016 ESC Guidelines for the management of atrial fibrillation  
21 444 developed in collaboration with EACTS. *Eur Heart J* 2016; 37: 2893-2962.
- 22  
23  
24  
25  
26  
27  
28  
29  
30  
31  
32  
33  
34  
35  
36  
37  
38  
39  
40  
41  
42  
43  
44  
45  
46  
47  
48  
49  
50  
51  
52  
53  
54  
55  
56  
57  
58  
59  
60

1  
2  
3 445 **Figure 1. Overview of the follow-up process for *Streptococcus pneumoniae*-infected and non-infected**  
4 446 **patients**

5  
6 447 Endpoints refer to the occurrence of a target cardiovascular event.

7 448

8  
9 449

10 450 **Figure 2. Selection of *Streptococcus pneumoniae*-infected and non-infected patients for analysis**

11 451 Prior CHD, HF, stroke, and AF refer only to previous events with in-hospital treatments. Abbreviations: CHD,  
12 452 coronary heart disease; HF, heart failure; AF, atrial fibrillation.

13 453

14 454

15 455 **Figure 3. Kaplan–Meier estimates for cardiovascular events in *Streptococcus pneumoniae*-infected and**  
16 456 **non-infected patients**

17 457 (A) Coronary heart disease (CHD), (B) heart failure (HF), (C) stroke, and (D) AF (Atrial fibrillation)

18 458

19 459

20 460 **Figure 4. Cumulative incidence curves for cardiovascular events in *Streptococcus pneumoniae*-infected**  
21 461 **and non-infected patients**

22 462 (A) Coronary heart disease (CHD), (B) heart failure (HF), (C) stroke, and (D) AF (Atrial fibrillation)

23  
24  
25  
26  
27  
28  
29  
30  
31  
32  
33  
34  
35  
36  
37  
38  
39  
40  
41  
42  
43  
44  
45  
46  
47  
48  
49  
50  
51  
52  
53  
54  
55  
56  
57  
58  
59  
60

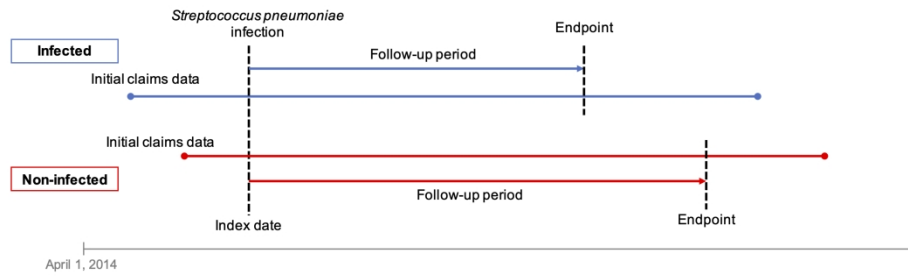

Figure 1. Overview of the follow-up process for Streptococcus pneumoniae-infected and non-infected patients.

Legend: Endpoints refer to the occurrence of a target cardiovascular event.

1028x342mm (72 x 72 DPI)

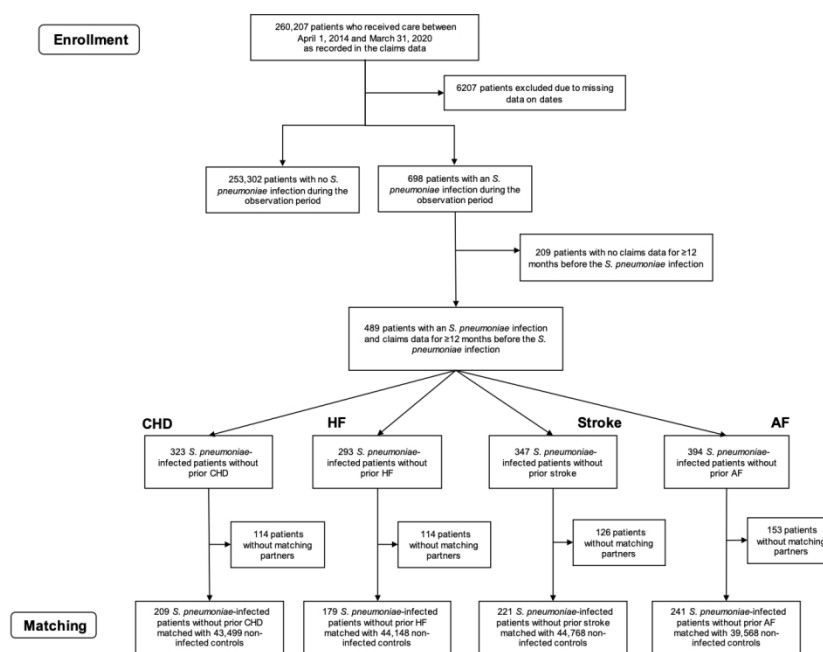

29  
30  
31  
32

Figure 2. Selection of Streptococcus pneumoniae-infected and non-infected patients for analysis  
Legend: Prior CHD, HF, stroke, and AF refer only to previous events with in-hospital treatments.  
Abbreviations: CHD, coronary heart disease; HF, heart failure; AF, atrial fibrillation.

33  
34  
35

579x403mm (72 x 72 DPI)

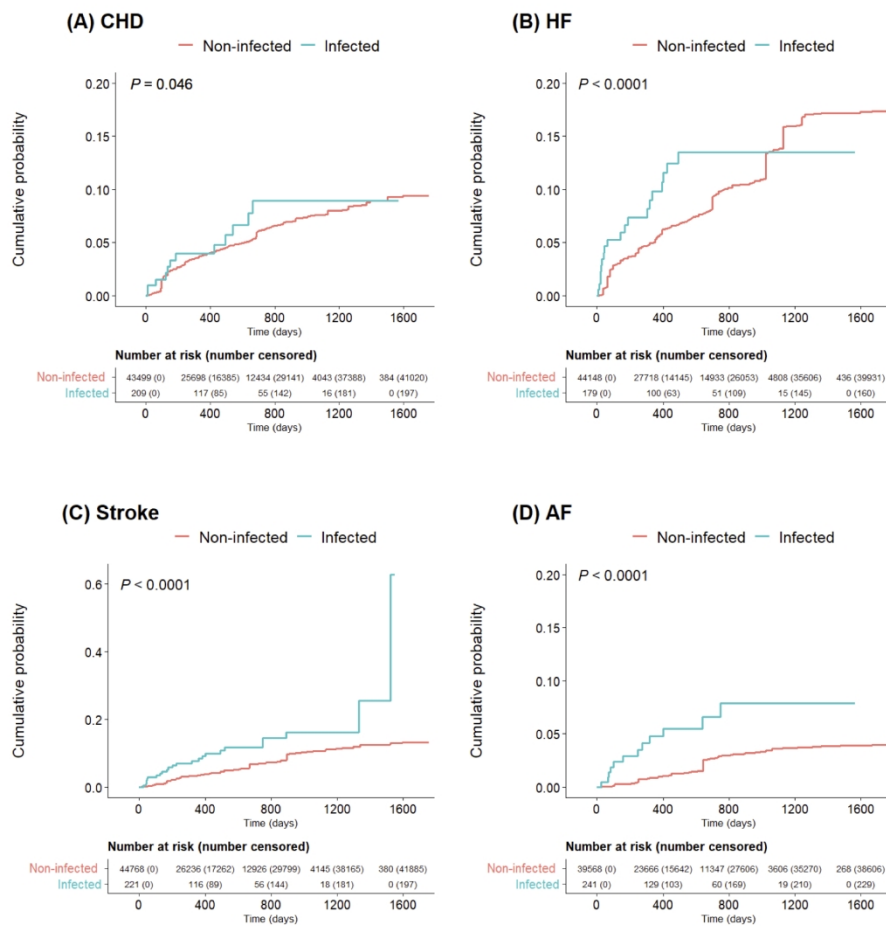

Figure 3. Kaplan–Meier estimates for cardiovascular events in *Streptococcus pneumoniae*-infected and non-infected patients

Legend: (A) Coronary heart disease (CHD), (B) heart failure (HF), (C) stroke, and (D) AF (Atrial fibrillation)

624x666mm (72 x 72 DPI)

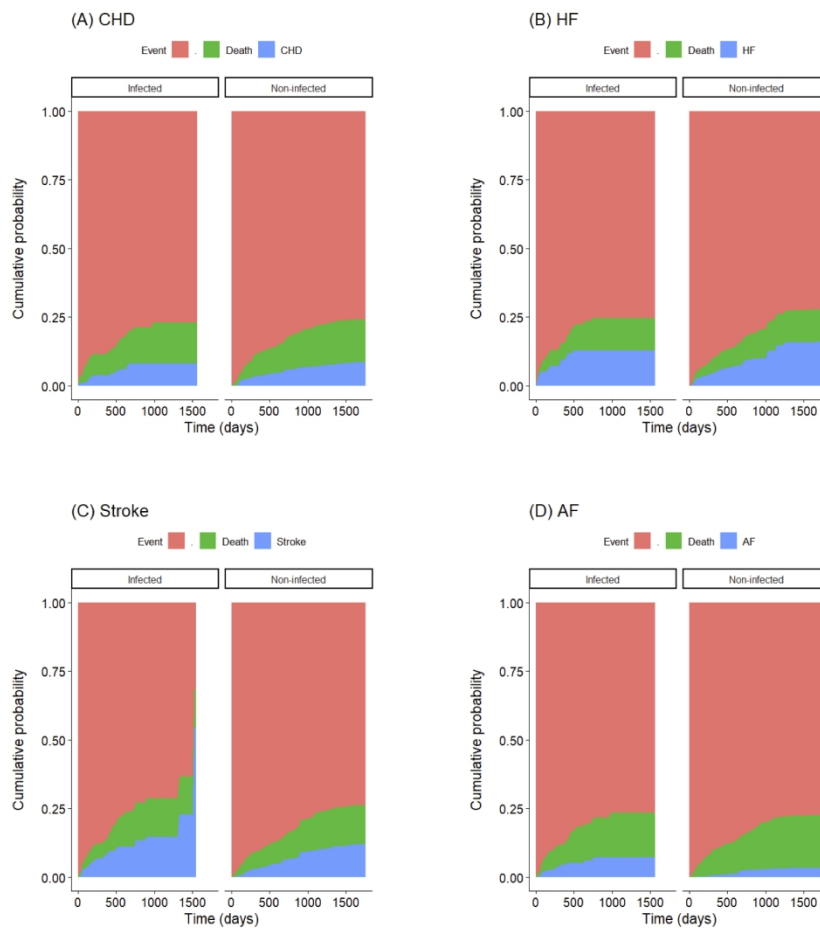

Caption : Figure 4. Cumulative incidence curves for cardiovascular events in Streptococcus pneumoniae-infected and non-infected patients

Legend: (A) Coronary heart disease (CHD), (B) heart failure (HF), (C) stroke, and (D) AF (Atrial fibrillation)

624x666mm (72 x 72 DPI)

# BMJ Open

## Risk of cardiovascular events leading to hospitalization after *Streptococcus pneumoniae* infection: A retrospective cohort LIFE study

|                                 |                                                                                              |
|---------------------------------|----------------------------------------------------------------------------------------------|
| Journal:                        | <i>BMJ Open</i>                                                                              |
| Manuscript ID                   | bmjopen-2021-059713.R2                                                                       |
| Article Type:                   | Original research                                                                            |
| Date Submitted by the Author:   | 07-Oct-2022                                                                                  |
| Complete List of Authors:       | Nishimura, Naoaki; Kyushu University School of Medicine, Fukuda, Haruhisa; Kyushu University |
| <b>Primary Subject Heading</b>: | Cardiovascular medicine                                                                      |
| Secondary Subject Heading:      | Epidemiology, Health services research, Infectious diseases, Public health                   |
| Keywords:                       | Epidemiology < INFECTIOUS DISEASES, Cardiac Epidemiology < CARDIOLOGY, EPIDEMIOLOGY          |
|                                 |                                                                                              |

SCHOLARONE™  
Manuscripts





I, the Submitting Author has the right to grant and does grant on behalf of all authors of the Work (as defined in the below author licence), an exclusive licence and/or a non-exclusive licence for contributions from authors who are: i) UK Crown employees; ii) where BMJ has agreed a CC-BY licence shall apply, and/or iii) in accordance with the terms applicable for US Federal Government officers or employees acting as part of their official duties; on a worldwide, perpetual, irrevocable, royalty-free basis to BMJ Publishing Group Ltd ("BMJ") its licensees and where the relevant Journal is co-owned by BMJ to the co-owners of the Journal, to publish the Work in this journal and any other BMJ products and to exploit all rights, as set out in our [licence](#).

The Submitting Author accepts and understands that any supply made under these terms is made by BMJ to the Submitting Author unless you are acting as an employee on behalf of your employer or a postgraduate student of an affiliated institution which is paying any applicable article publishing charge ("APC") for Open Access articles. Where the Submitting Author wishes to make the Work available on an Open Access basis (and intends to pay the relevant APC), the terms of reuse of such Open Access shall be governed by a Creative Commons licence – details of these licences and which [Creative Commons](#) licence will apply to this Work are set out in our licence referred to above.

Other than as permitted in any relevant BMJ Author's Self Archiving Policies, I confirm this Work has not been accepted for publication elsewhere, is not being considered for publication elsewhere and does not duplicate material already published. I confirm all authors consent to publication of this Work and authorise the granting of this licence.

1  
2  
3  
4 1 ***BMJ Open***  
5

6  
7 2 **Risk of cardiovascular events leading to hospitalization after *Streptococcus pneumoniae***  
8 3 **infection: A retrospective cohort LIFE study**  
9

10 4 Naoaki Nishimura<sup>1)</sup>, Haruhisa Fukuda<sup>2)\*</sup>  
11 5

12  
13 6 <sup>1)</sup> Kyushu University School of Medicine, Fukuoka, Kyushu, Japan

14 7 <sup>2)</sup> Kyushu University Graduate School of Medical Sciences, Fukuoka, Kyushu, Japan  
15

16 8  
17 9 **\* Corresponding Author:**

18  
19 10 Haruhisa Fukuda, MPH, PhD

20 11 Department of Health Care Administration and Management, Kyushu University Graduate School of  
21 12 Medical Sciences

22  
23 13 3-1-1 Maidashi Higashi-ku Fukuoka 812-8582, Japan

24  
25 14 Phone: +81-92-642-6956 Fax: +81-92-642-6961

26  
27 15 Email address: fukuda.haruhisa.977@m.kyushu-u.ac.jp  
28  
29  
30  
31  
32  
33  
34  
35  
36  
37  
38  
39  
40  
41  
42  
43  
44  
45  
46  
47  
48  
49  
50  
51  
52  
53  
54  
55  
56  
57  
58  
59  
60

1  
2  
3 16 **Abstract**

4 17 **Objectives:** To elucidate the risk of cardiovascular event occurrence following *Streptococcus*  
5 18 *pneumoniae* infection.

6 19 **Design:** Retrospective cohort study using a LIFE Study database.

7 20 **Setting:** Three municipalities in Japan.

8 21 **Participants:** Municipality residents who were enrolled in either National Health Insurance  
9 22 or the Latter-Stage Elderly Healthcare System from April 2014 to March 2020.

10 23 **Exposure:** Occurrence of *S. pneumoniae* infection.

11 24 **Primary Outcome Measures:** Occurrence of one of the following cardiovascular events that  
12 25 led to hospitalization after *S. pneumoniae* infection: (1) coronary heart disease (CHD), (2)  
13 26 heart failure (HF), (3) stroke, or (4) atrial fibrillation (AF).

14 27 **Results:** *S. pneumoniae*-infected patients were matched with non-infected patients for each  
15 28 cardiovascular event. We matched 209 infected patients and 43,499 non-infected patients for  
16 29 CHD, 179 infected patients and 44,148 non-infected patients for HF, 221 infected patients and  
17 30 44,768 non-infected patients for stroke, and 241 infected patients and 39,568 non-infected  
18 31 patients for AF. During follow-up, the incidence rates for the matched infected and non-  
19 32 infected patients were, respectively, 38.6 (95% confidence interval: 19.9-67.3) and 30.4 (29.1-  
20 33 31.8) per 1000 person-years for CHD; 69.6 (41.9-108.8) and 50.5 (48.9-52.2) per 1000  
21 34 person-years for HF; 75.4 (48.3-112.2) and 35.5 (34.1-36.9) per 1000 person-years for stroke;  
22 35 and 34.7 (17.9-60.6) and 11.2 (10.4-12.0) per 1000 person-years for AF. Infected patients  
23 36 were significantly more likely to develop stroke (adjusted hazard ratio: 2.05, 95% confidence  
24 37 interval: 1.22–3.47; adjusted subdistribution hazard ratio: 1.94, 95% confidence interval: 1.15-  
25 38 3.26) and AF (3.29, 1.49-7.26; 2.74, 1.24-6.05) than their non-infected counterparts.

26 39 **Conclusions:** *S. pneumoniae* infections elevate the risk of subsequent stroke and AF  
27 40 occurrence. These findings indicate that pneumococcal infections not only have short-term  
28 41 effects on patients' health, but also increase their mid-to long-term susceptibility to serious  
29 42 cardiovascular events.  
30 43

1  
2  
3  
4 44 **Article Summary (Strengths and Limitations of this study)**

- 5 45 • This study comparatively examined both *Streptococcus pneumoniae*-infected patients and non-  
6 46 infected controls to elucidate the association between pneumococcal infections and subsequent  
7 47 cardiovascular events.  
8  
9 48 • While prior studies mostly focused on short-term outcomes, our study period spanned from April 2014  
10 49 to March 2020 to examine the mid-to long-term risks of cardiovascular events following  
11 50 pneumococcal infection.  
12  
13 51 • Despite a relatively large study sample and long study period, *S. pneumoniae* infections and  
14 52 cardiovascular events were identified using only diagnosis codes in the claims data.  
15  
16 53 • Our study did not account for patients' lifestyle factors (e.g., tobacco and alcohol consumption),  
17 54 socioeconomic factors, or pneumococcal vaccination statuses.  
18  
19  
20 55

## 56 Introduction

57 Community-acquired pneumonia is a major infectious disease that frequently leads to  
58 hospitalization, and exhibits high morbidity and mortality rates across numerous countries [1,  
59 2]. *Streptococcus pneumoniae* is the causal pathogen for a large proportion of pneumonia  
60 cases that require hospital-based care [3]. As older persons are more susceptible to  
61 pneumococcal pneumonia [4], this condition represents a particularly serious public health  
62 problem in countries with aging populations. In addition to its acute effects, pneumonia is also  
63 known to increase the mid-to long-term health risks of infected patients, thereby placing a  
64 heavy clinical and economic burden on patients and society [2, 5].

65 Previous cohort studies have reported that pneumonia is associated with an increased  
66 risk of the following conditions: overall cardiac events [6-14], acute coronary syndrome [6, 8,  
67 9, 11, 12, 14-17], heart failure (HF) [6, 9-14, 16, 18], atrial fibrillation (AF) [6, 8-14, 16, 17,  
68 19, 20], and stroke [11, 12, 17]. However, the majority of these studies focused on pneumonia  
69 patients without comparisons with non-infected controls, and generally used relatively short  
70 follow-up periods. Furthermore, only a few studies in the existing literature have explored the  
71 effects of pneumonia on subsequent cardiovascular disease [7, 18, 21].

72 In order to accurately evaluate the impact of *S. pneumoniae* infection on subsequent  
73 cardiovascular disease, there is a need for long-term cohort studies that compare infected  
74 patients with matched non-infected controls. This study aimed to elucidate the risk of  
75 cardiovascular event occurrence following *S. pneumoniae* infection using administrative  
76 claims data acquired from infected and non-infected patients in 3 Japanese municipalities. The  
77 study also examined if these risks differ among age groups.

## 79 Methods

### 80 Study data

81 Data were provided by the Longevity Improvement & Fair Evidence (LIFE) Study, which is  
82 managed by Kyushu University (Fukuoka, Japan) [22]. In the LIFE Study, participating  
83 municipalities voluntarily provide administrative claims data for research purposes. These  
84 claims data are acquired from the municipalities' residents who are enrolled in either National  
85 Health Insurance or the Latter-Stage Elderly Healthcare System, and encompass information  
86 on patient characteristics and reimbursement claims for all insurance-covered healthcare  
87 provided in the inpatient and outpatient settings. Enrollees in National Health Insurance  
88 include the self-employed, agricultural and fishery workers, part-time workers, retirees, and  
89 their dependents. Enrollees in the Latter-Stage Elderly Healthcare System include residents  
90 aged  $\geq 75$  years. The number of municipalities participating in the LIFE Study varies over  
91 time owing to differences in agreement contracts, with the earliest participant providing data  
92 from April 2014. The majority of the participating municipalities provide data from April

1  
2  
3 93 2015 onward. As of 2021, the LIFE Study is able to conduct longitudinal studies with 5-year  
4 94 follow-up periods.

5  
6 95 For this study, claims data from April 2014 to March 2020 were acquired from  
7  
8 96 insurance enrollees who were residing in 3 municipalities (residential populations: 58,000,  
9 97 121,600, and 305,200) in Fukuoka Prefecture. The claims datasets contained records of  
10 98 diagnoses (Japanese diagnosis codes and International Classification of Diseases, 10th  
11 99 revision [ICD-10] codes), dates of treatments and admissions, and coexisting conditions. For  
12  
13 100 the coexisting conditions, we analyzed the list of comorbidities included in the Charlson  
14 101 comorbidity index using ICD-10 codes recorded in both inpatient and outpatient claims.  
15  
16 102

### 17 18 19 103 *Study subjects*

20  
21 104 First, patients with *S. pneumoniae* infections were identified through combinations of ICD-10  
22 105 codes and/or Japanese diagnosis codes developed by the Ministry of Health, Labour and  
23 106 Welfare. We used the combinations of codes proposed by Imai et al. [23]. In this study, we  
24 107 considered all types of *S. pneumoniae* infections, including invasive pneumococcal diseases.  
25 108 The occurrence of subsequent cardiovascular events leading to hospitalization (coronary heart  
26 109 disease [CHD], HF, stroke, and AF) was identified using ICD-10 codes. We excluded patients  
27 110 with records of previous in-hospital cardiovascular events from their earliest recorded dates  
28 111 within the observation period until *S. pneumoniae* infection, patients with records of  
29 112 cardiovascular events during the index hospitalization for *S. pneumoniae* infection, and  
30 113 patients without any claims data  $\geq 12$  months before *S. pneumoniae* infection.  
31  
32

33 114 Next, we set each infected patient's index date as the last day of the month containing  
34 115 a recorded *S. pneumoniae* infection. The infected patients were then exactly matched with a  
35 116 cohort of non-infected patients according to age (within 5 years), sex, comorbidities, and  
36 117 hospitalization at the index date using sampling without replacement. The comorbidities  
37 118 included the following conditions: myocardial infarction, congestive HF, peripheral vascular  
38 119 disease, cerebrovascular disease, dementia, chronic pulmonary disease, rheumatic disease,  
39 120 peptic ulcer disease, liver disease, diabetes with/without chronic complications, hemiplegia or  
40 121 paraplegia, malignancy, metastatic solid tumor, and HIV/AIDS [24]. When examining the  
41 122 occurrence of AF after *S. pneumoniae* infection, we also included the comorbidity of AF as a  
42 123 matching criterion. Infected patients who could not be matched with non-infected patients  
43 124 were excluded. The index date for each non-infected patient was set as the same date as  
44 125 his/her matched infected case. Each patient's comorbidities were identified using claims data  
45 126 for 30 days before the index date. We also excluded non-infected patients who had  
46 127 experienced cardiovascular events that led to hospitalization before their index dates.  
47  
48  
49  
50  
51  
52  
53  
54  
55  
56  
57  
58  
59  
60

## 129 *Outcome measure*

130 The outcome measure was the occurrence of a cardiovascular event that led to hospitalization  
131 after the *S. pneumoniae* infection date. Among inpatients, the infection date was set as the  
132 first date of admission for the in-hospital treatment of an *S. pneumoniae* infection. Among  
133 outpatients, the infection date was set as the first date of any medical treatment with a  
134 diagnosis code indicating an *S. pneumoniae* infection. We focused on the first infection  
135 episode for patients who had multiple infection episodes during the observation period.

136 Next, we examined the subsequent occurrence of each of the following 4  
137 cardiovascular events that led to hospitalization: (1) CHD (ICD-10 codes: I20-25), (2) HF  
138 (I50), (3) stroke (I61-63, 65-66), and (4) AF (I48). The occurrence date of each cardiovascular  
139 event was set as the date of admission for the in-hospital treatment of that event.

140 Patients who had died during the observation period without developing any  
141 cardiovascular event were followed-up until the last date of medical treatments in the claims  
142 data. Patients who had died during the observation period after developing a cardiovascular  
143 event were followed-up until the date of the cardiovascular event occurrence. All survivors  
144 were followed-up until the end of their municipality's observation period. The ends of the  
145 observation periods ranged from September 2019 to March 2020 among the municipalities.  
146 **Figure 1** shows an overview of the follow-up process.

## 148 *Statistical analysis*

149 Our analysis was designed to examine the possible effects of *S. pneumoniae* infection on the  
150 subsequent occurrence of cardiovascular events, and to determine if these effects differed  
151 among age groups. For each of the 4 target cardiovascular events, we calculated the number  
152 of events for the infected group and non-infected group during the observation period, and  
153 estimated the incidence rates per 1000 person-years. Cox proportional hazards models were  
154 constructed to estimate the hazard ratio (HRs) and 95% confidence interval (CIs) of each  
155 cardiovascular event in the infected group relative to the non-infected group. Subdistribution  
156 HRs were also estimated with Cox proportional hazards models using the Fine–Gray  
157 competing risk approach in which death was regarded as a competing event. The Kaplan–  
158 Meier method was used to calculate the cumulative probability of cardiovascular event  
159 occurrence in the 2 groups. In addition, we analyzed the patients stratified according to the  
160 following age groups: 0–49 years, 50–64 years, and  $\geq 65$  years.

161 All statistical analyses were performed using R (version 4.1.0) and R Studio (version  
162 1.4.1106) software. Two-tailed *P* values below 0.05 were considered statistically significant.

#### 164 *Patient and public involvement*

165 Patients and/or the public were not involved in the design, conduct, reporting, or dissemination plans  
166 of this research.

167

#### 168 **Results**

169 We first identified 698 *S. pneumoniae*-infected patients and 253,302 non-infected patients  
170 between April 1, 2014 and March 31, 2020 (**Figure 2**). After applying the exclusion criteria,  
171 489 eligible infected patients were included in the analysis. There were 22 invasive  
172 pneumococcal disease cases (4.5%) and 467 non-invasive pneumococcal disease cases  
173 (95.5%). Among the infected patients that could be successfully matched with non-infected  
174 patients for each cardiovascular event, we identified 209 infected patients without prior CHD,  
175 179 infected patients without prior HF, 221 infected patients without prior stroke, and 241  
176 infected patients without prior AF. Using the various matching criteria, we matched 43,499,  
177 44,148, 44,768, and 39,568 non-infected controls with the infected patients for CHD, HF,  
178 stroke, and AF, respectively. The non-infected patients were followed-up from the first *S.*  
179 *pneumoniae* infection date of their matched infected patients. **Table 1** shows the  
180 characteristics and comorbidities of the infected and non-infected patients. The covariate  
181 balance summaries before and after matching for the target cardiovascular events are  
182 presented in **Supplementary Tables 1–4**.

183 **Table 2** summarizes the risk of each cardiovascular event after *S. pneumoniae*  
184 infection. The observation periods of the matched infected and non-infected patients  
185 (weighted by the proportion of the infected patients) were, respectively, 311 and 68,706  
186 person-years for CHD; 273 and 74,999 person-years for HF; 318 and 70,454 person-years for  
187 stroke; and 346 and 62,986 person-years for AF. The median observation periods of the  
188 matched infected and non-infected patients were 823 days for CHD, 827 days for HF, 820  
189 days for stroke, and 797 days for AF. During follow-up, the incidence rates for the infected  
190 and non-infected patients were, respectively, 38.6 (95% CI: 19.9–67.3) and 30.4 (95% CI:  
191 29.1–31.8) per 1000 person-years for CHD; 69.6 (41.9–108.8) and 50.5 (48.9–52.2) per 1000  
192 person-years for HF; 75.4 (48.3–112.2) and 35.5 (34.1–36.9) per 1000 person-years for  
193 stroke; and 34.7 (17.9–60.6) and 11.2 (10.4–12.0) per 1000 person-years for AF. The  
194 unadjusted HRs for cardiovascular event occurrence in infected patients (relative to non-  
195 infected patients) were 1.27 (95% CI: 0.72–2.24) for CHD, 1.38 (0.88–2.16) for HF, 2.12  
196 (1.42–3.17) for stroke, and 3.11 (1.76–5.50) for AF. After adjusting for age, sex,  
197 comorbidities, and coexisting AF (only for the outcome of AF), infected patients were  
198 significantly more likely to develop stroke (adjusted HR: 2.05, 95% CI: 1.22–3.47) and AF  
199 (adjusted HR: 3.29, 95% CI: 1.49–7.26) than their non-infected counterparts. When death was  
200 regard as a competing event, the adjusted subdistribution HRs were 1.19 (95% CI: 0.63–2.26)



201 **Table 1. Characteristics and comorbidities of *Streptococcus pneumoniae*-infected and non-infected patients**

|                                        | CHD          |           | HF           |           | Stroke       |           | AF           |           |
|----------------------------------------|--------------|-----------|--------------|-----------|--------------|-----------|--------------|-----------|
|                                        | Non-infected | Infected  | Non-infected | Infected  | Non-infected | Infected  | Non-infected | Infected  |
| N                                      | 43,499       | 209       | 44,148       | 179       | 44,768       | 221       | 39,568       | 241       |
| Cardiovascular event incidence         | 2,090 (4.8%) | 12 (5.7%) | 3,790 (8.6%) | 19 (11%)  | 2,502 (5.6%) | 24 (11%)  | 703 (1.8%)   | 12 (5.0%) |
| Age, mean (y)                          | 77.0         | 77.1      | 75.4         | 75.6      | 77.5         | 77.7      | 77.5         | 77.7      |
| Men                                    | 22,062 (51%) | 106 (51%) | 24,417 (55%) | 99 (55%)  | 22,890 (51%) | 113 (51%) | 20,523 (52%) | 125 (52%) |
| Women                                  | 21,437 (49%) | 103 (49%) | 19,731 (45%) | 80 (45%)  | 21,878 (49%) | 108 (49%) | 19,045 (48%) | 116 (48%) |
| Hospital admission                     | 30,595 (70%) | 147 (70%) | 29,103 (66%) | 118 (66%) | 31,804 (71%) | 157 (71%) | 29,224 (74%) | 178 (74%) |
| Myocardial infarction                  | 0 (0%)       | 0 (0%)    | 247 (0.6%)   | 1 (0.6%)  | 203 (0.5%)   | 1 (0.5%)  | 164 (0.4%)   | 1 (0.4%)  |
| Congestive heart failure               | 4,787 (11%)  | 23 (11%)  | 987 (2.2%)   | 4 (2.2%)  | 4,051 (9.0%) | 20 (9.0%) | 4,433 (11%)  | 27 (11%)  |
| Peripheral vascular disease            | 1,249 (2.9%) | 6 (2.9%)  | 1,233 (2.8%) | 5 (2.8%)  | 1,418 (3.2%) | 7 (3.2%)  | 1,149 (2.9%) | 7 (2.9%)  |
| Cerebrovascular disease                | 6,036 (14%)  | 29 (14%)  | 5,179 (12%)  | 21 (12%)  | 4,254 (9.5%) | 21 (9.5%) | 5,254 (13%)  | 32 (13%)  |
| Dementia                               | 6,244 (14%)  | 30 (14%)  | 4,933 (11%)  | 20 (11%)  | 5,267 (12%)  | 26 (12%)  | 4,761 (12%)  | 29 (12%)  |
| Chronic pulmonary disease              | 12,488 (29%) | 60 (29%)  | 14,305 (32%) | 58 (32%)  | 12,762 (29%) | 63 (29%)  | 11,000 (28%) | 67 (28%)  |
| Rheumatic disease                      | 624 (1.4%)   | 3 (1.4%)  | 1,233 (2.8%) | 5 (2.8%)  | 810 (1.8%)   | 4 (1.8%)  | 985 (2.5%)   | 6 (2.5%)  |
| Peptic ulcer disease                   | 2,914 (6.7%) | 14 (6.7%) | 3,453 (7.8%) | 14 (7.8%) | 2,633 (5.9%) | 13 (5.9%) | 2,134 (5.4%) | 13 (5.4%) |
| Mild liver disease                     | 6,868 (16%)  | 33 (16%)  | 7,399 (17%)  | 30 (17%)  | 6,685 (15%)  | 33 (15%)  | 4,925 (12%)  | 30 (12%)  |
| Diabetes without chronic complications | 624 (1.4%)   | 3 (1.4%)  | 493 (1.1%)   | 2 (1.1%)  | 405 (0.9%)   | 2 (0.9%)  | 328 (0.8%)   | 2 (0.8%)  |
| Diabetes with chronic complications    | 1,249 (2.9%) | 6 (2.9%)  | 1,726 (3.9%) | 7 (3.9%)  | 1,215 (2.7%) | 6 (2.7%)  | 1,149 (2.9%) | 7 (2.9%)  |
| Hemiplegia or paraplegia               | 0 (0%)       | 0 (0%)    | 0 (0%)       | 0 (0%)    | 0 (0%)       | 0 (0%)    | 0 (0%)       | 0 (0%)    |
| Renal disease                          | 416 (1.0%)   | 2 (1.0%)  | 493 (1.1%)   | 2 (1.1%)  | 810 (1.8%)   | 4 (1.8%)  | 657 (1.7%)   | 4 (1.7%)  |
| Malignancy                             | 3,538 (8.1%) | 17 (8.1%) | 4,686 (11%)  | 19 (11%)  | 4,051 (9.0%) | 20 (9.0%) | 3,284 (8.3%) | 20 (8.3%) |
| Moderate or severe liver disease       | 0 (0%)       | 0 (0%)    | 0 (0%)       | 0 (0%)    | 0 (0%)       | 0 (0%)    | 0 (0%)       | 0 (0%)    |
| Metastatic solid tumor                 | 833 (1.9%)   | 4 (1.9%)  | 987 (2.2%)   | 4 (2.2%)  | 608 (1.4%)   | 3 (1.4%)  | 657 (1.7%)   | 4 (1.7%)  |
| HIV/AIDS                               | 0 (0%)       | 0 (0%)    | 0 (0%)       | 0 (0%)    | 0 (0%)       | 0 (0%)    | 0 (0%)       | 0 (0%)    |
| AF                                     |              |           |              |           |              |           | 328 (0.8%)   | 2 (0.8%)  |

202 Values are presented as number (percentage) unless stated otherwise. Abbreviations: CHD, coronary heart disease; HF, heart failure; AF, atrial fibrillation.

203 **Table 2. Cardiovascular events in *Streptococcus pneumoniae*-infected and non-infected patients**

|                                                             | CHD              |                   | HF               |                   | Stroke           |                   | AF               |                   |
|-------------------------------------------------------------|------------------|-------------------|------------------|-------------------|------------------|-------------------|------------------|-------------------|
|                                                             | Non-infected     | Infected          | Non-infected     | Infected          | Non-infected     | Infected          | Non-infected     | Infected          |
| Overall                                                     |                  |                   |                  |                   |                  |                   |                  |                   |
| N                                                           | 43,499           | 209               | 44,148           | 179               | 44,768           | 221               | 39,568           | 241               |
| Incidence, n (%)                                            | 2,090 (4.8%)     | 12 (5.7%)         | 3,790 (8.6%)     | 19 (11%)          | 2,502 (5.6%)     | 24 (11%)          | 703 (1.8%)       | 12 (5.0%)         |
| Person-years of follow-up                                   | 68,706           | 311               | 74,999           | 273               | 70,454           | 318               | 62,986           | 346               |
| Incidence rate per 1000 person-years (95% CI)               | 30.4 (29.1-31.8) | 38.6 (19.9-67.3)  | 50.5 (48.9-52.2) | 69.6 (41.9-108.8) | 35.5 (34.1-36.9) | 75.4 (48.3-112.2) | 11.2 (10.4-12.0) | 34.7 (17.9-60.6)  |
| Unadjusted hazard ratio (95% CI)                            | -                | 1.27 (0.72-2.24)  | -                | 1.38 (0.88-2.16)  | -                | 2.12 (1.42-3.17)  | -                | 3.11 (1.76-5.50)  |
| Adjusted hazard ratio <sup>a</sup> (95% CI)                 | -                | 1.20 (0.60-2.39)  | -                | 1.18 (0.58-2.37)  | -                | 2.05 (1.22-3.47)  | -                | 3.29 (1.49-7.26)  |
| Adjusted subdistribution hazard ratio <sup>a</sup> (95% CI) | -                | 1.19 (0.63-2.26)  | -                | 1.13 (0.60-2.13)  | -                | 1.94 (1.15-3.26)  | -                | 2.74 (1.24-6.05)  |
| By age group                                                |                  |                   |                  |                   |                  |                   |                  |                   |
| N (%)                                                       |                  |                   |                  |                   |                  |                   |                  |                   |
| 0-49 years                                                  | 1,958 (4.5%)     | 9 (4.3%)          | 2,304 (5.2%)     | 9 (5.0%)          | 1,895 (4.2%)     | 9 (4.1%)          | 1,533 (3.9%)     | 9 (3.7%)          |
| 50-64 years                                                 | 3,963 (9.1%)     | 21 (10%)          | 4,080 (9.2%)     | 18 (10%)          | 3,620 (8.1%)     | 19 (8.6%)         | 3,305 (8.4%)     | 22 (9.1%)         |
| ≥65 years                                                   | 37,578 (86%)     | 179 (86%)         | 37,765 (86%)     | 152 (85%)         | 39,253 (88%)     | 193 (87%)         | 34,730 (88%)     | 210 (87%)         |
| Incidence rate per 1000 person-years (95% CI)               |                  |                   |                  |                   |                  |                   |                  |                   |
| 0-49 years                                                  | 8.0 (5.6-11.0)   | 0 (0-200.4)       | 15.0 (11.8-18.7) | 0 (0-200.4)       | 3.0 (1.6-5.1)    | 0 (0-200.4)       | 1.2 (0.3-3.0)    | 0 (0-200.4)       |
| 50-64 years                                                 | 5.4 (4.0-7.0)    | 21.8 (0.6-121.5)  | 29.4 (26.1-33.1) | 24.3 (0.6-135.1)  | 35.1 (31.3-39.3) | 69.7 (14.4-203.6) | 6.2 (4.6-8.2)    | 21.4 (0.5-119.2)  |
| ≥65 years                                                   | 36.7 (35.1-38.3) | 44.5 (22.2-79.7)  | 57.1 (55.2-59.0) | 84.4 (50.0-133.4) | 38.0 (36.5-39.7) | 81.8 (50.6-125.0) | 12.6 (11.7-13.6) | 39.2 (19.6-70.1)  |
| Adjusted hazard ratio <sup>a</sup> (95% CI)                 |                  |                   |                  |                   |                  |                   |                  |                   |
| 0-49 years                                                  | -                | 0                 | -                | 0                 | -                | 0                 | -                | 0                 |
| 50-64 years                                                 | -                | 4.06 (0.56-29.38) | -                | 0.82 (0.12-5.86)  | -                | 1.98 (0.64-6.19)  | -                | 3.47 (0.48-25.02) |
| ≥65 years                                                   | -                | 1.21 (0.64-2.10)  | -                | 1.48 (0.78-1.97)  | -                | 2.15 (1.29-3.04)  | -                | 3.11 (1.58-5.20)  |

<sup>a</sup> Adjusted for age, sex, comorbidities, and coexisting AF (only for the outcome of AF).

Abbreviations: CHD, coronary heart disease; HF, heart failure; AF, atrial fibrillation; CI, confidence interval.

1  
2  
3 206 for CHD, 1.13 (0.60–2.13) for HF, 1.94 (1.15–3.26) for stroke, and 2.74 (1.24–6.05) for AF.  
4  
5 207 Infected patients were still significantly more likely to develop stroke and AF than their non-  
6  
7 208 infected counterparts.

8 209 In the age-stratified analysis, *S. pneumonia* infections were not significantly associated  
9  
10 210 with a higher risk of the 4 cardiovascular events in patients aged 50–64 years. Among older  
11  
12 211 patients aged  $\geq 65$  years, *S. pneumonia* infections were significantly associated with  
13  
14 212 substantially higher risks of stroke and AF occurrence.

15 213 **Figure 3** presents the Kaplan–Meier curves of each cardiovascular event. When  
16  
17 214 compared with non-infected patients, infected patients had a significantly higher risk of  
18  
19 215 incident HF, stroke, and AF (all  $P < 0.0001$ ); but not CHD ( $P = 0.046$ ).

20 216 **Figure 4** presents the cumulative incidence curves for cardiovascular events where  
21  
22 217 death was regarded as a competing event.

## 23 218 Discussion

24 219 Through an analysis of National Health Insurance and Latter-Stage Elderly Healthcare  
25  
26 220 System enrollees residing in 3 Japanese municipalities, this study comparatively examined the  
27  
28 221 incidence of cardiovascular events leading to hospitalization between *S. pneumoniae*-infected  
29  
30 222 patients and non-infected patients. Our results showed that the experience of *S. pneumoniae*  
31  
32 223 infection significantly elevates the risk of subsequent stroke and AF. *S. pneumoniae* infection  
33  
34 224 increased the risk of these cardiovascular events among older patients aged  $\geq 65$  years. While  
35  
36 225 *S. pneumonia* infections were not significantly associated with a higher risk of these  
37  
38 226 cardiovascular events in patients aged 50–64 years, the ratios were relatively high and more  
39  
40 227 studies should be conducted. These findings may help to identify at-risk targets for expanded  
41  
42 228 pneumococcal vaccination programs.

43 229 Recent studies have shown that patients with community-acquired pneumonia have a  
44  
45 230 higher frequency of cardiovascular events [8, 10, 11, 16, 18, 21, 25, 26]. Our estimated  
46  
47 231 incidence of AF after *S. pneumoniae* infection was 5.0%. The incidence of arrhythmia (ICD-  
48  
49 232 10 codes: I47-49) in this study was estimated to be 9.0%, which is slightly higher than that of  
50  
51 233 a previous meta-analysis that estimated an overall incidence of 7.2% among inpatients with  
52  
53 234 community-acquired pneumonia [25]. This discrepancy may be explained by the fact that the  
54  
55 235 meta-analysis had only included studies with short-term outcomes.

56 236 In our analysis, the estimated incidence of stroke after *S. pneumoniae* infection was  
57  
58 237 considerably higher than those found in previous studies [11,16]. Perry et al. reported a stroke  
59  
60 238 incidence of 0.17% in 40,979 patients during 90 days of admission for pneumonia, whereas  
61  
62 239 Violi et al. reported a stroke incidence of 1.0% in 1,182 patients hospitalized for community-  
63  
64 240 acquired pneumonia during in-hospital follow-up (median length of hospital stay: 11 days).  
65  
66 241 Accordingly, those 2 studies had focused on the short-term incidence of stroke. However, the  
67  
68 242 risk of stroke increases with age, and longer follow-up periods after *S. pneumoniae* infection  
69  
70 243 would therefore provide a more accurate depiction of its risks. Furthermore, Perry et al. used

1  
2  
3 244 ICD-9 codes to identify stroke, whereas Violi et al. identified stroke cases through clinical  
4 245 manifestations confirmed by computed tomography or magnetic resonance imaging [11,16].  
5 246 Stroke diagnostic methods are generally reliant on imaging data, and many medical facilities  
6 247 in Japan are equipped with on-site computed tomography and/or magnetic resonance imaging  
7 248 scanners. This enables the accurate diagnosis of stroke, including cases of milder strokes,  
8 249 throughout Japan.

12 250 Among the studies that reported a high frequency of subsequent cardiovascular events  
13 251 in pneumonia patients, few have actually compared infected patients with non-infected  
14 252 controls. Eurich et al. performed a long-term prospective cohort study of both inpatients and  
15 253 outpatients with community-acquired pneumonia, and found that these infections substantially  
16 254 increased the risk of HF across different age groups and disease severity [18]. During a  
17 255 median follow-up period of 9.9 years, 11.9% of patients with pneumonia developed incident  
18 256 HF compared with 7.4% of the non-infected controls; furthermore, 13.3% of patients with  
19 257 pneumococcal bacteremia developed incident HF [18]. In contrast, 13.0% of our infected  
20 258 patients developed incident HF compared with 12.0% of their non-infected counterparts, with  
21 259 no significant difference between the groups. This discrepancy may be influenced by the fact  
22 260 that Eurich et al. used a control group that only controlled for age (five-year age bands) and  
23 261 sex, only investigated outpatients in emergency departments, and focused on severe  
24 262 pneumonia infections. In contrast, our study included outpatients from all types of medical  
25 263 institutions, and our control group comprised patients without any *S. pneumoniae* infection.  
26 264 Our study also utilized a research design that differed from Eurich et al. [18], which only  
27 265 matched for age and sex, and adjusted for the effects for coexisting conditions by including  
28 266 them as covariates in analytical models. However, we matched infected patients and non-  
29 267 infected controls not only by age and sex, but also by comorbidities.

39 268 To our knowledge, few studies have shown the long-term risks of subsequent stroke  
40 269 and AF after *S. pneumoniae* infection (including non-hospitalized cases) relative to non-  
41 270 infected controls. Severe cases of pneumonia require hospital-based care, especially among  
42 271 older adults. Therefore, studies that focus on hospitalized pneumonia patients would overlook  
43 272 the risks associated with less severe cases. For example, although patients aged  $\leq 65$  years  
44 273 may have milder *S. pneumoniae* infections and a correspondingly lower risk of hospitalization  
45 274 than older patients, these infections could still elevate the risk of subsequent cardiovascular  
46 275 events in the younger age groups. As this study used insurance claims data that incorporated  
47 276 both inpatient and outpatient data, we were able to identify the risk of cardiovascular events  
48 277 after *S. pneumoniae* infection in patients regardless of whether they required hospitalization.  
49 278 Moreover, our study excluded patients who had subsequent cardiovascular events during the  
50 279 index hospital stay for *S. pneumoniae* infection. For patients who were admitted to hospital  
51 280 due to *S. pneumoniae* infection, we only monitored for cardiovascular events that occurred  
52 281 after discharge. Most studies have reported the short-term risks of cardiovascular events  
53 282 during or after acute infections, and the long-term impact of pneumonia on subsequent

1  
2  
3 283 cardiovascular disease occurrence is less clear. Therefore, our study provides new insight into  
4 284 the mid-to long-term effects of milder *S. pneumoniae* infections treated in outpatient settings  
5 285 as well as severe *S. pneumoniae* infections that require hospitalization.

6  
7  
8 286 A previous study identified the major causative organisms of community-acquired  
9 287 pneumonia to be *S. pneumoniae*, *Haemophilus influenzae*, *Mycoplasma pneumoniae*,  
10 288 *Chlamydia pneumoniae*, *Legionella pneumophila*, *Staphylococcus aureus*, and several  
11 289 viral pathogens (including influenza A and B) [27]. *S. pneumoniae* reportedly reduces cardiac  
12 290 contractility by increasing cardiomyocyte uptake of bacterial cell wall antigens [28]. Many  
13 291 studies that seek to understand the pathogenesis of cardiovascular events following  
14 292 pneumonia focus on infections caused by *S. pneumoniae* [29]. Several studies have proposed  
15 293 that *S. pneumoniae* cell wall components and pneumolysin (a pore-forming toxin) trigger pro-  
16 294 inflammatory mechanisms that ultimately result in cardiac damage [30-33]. Furthermore, the  
17 295 infection-mediated hyperactivation of platelets can create a pro-inflammatory and  
18 296 prothrombotic environment that facilitates the occurrence of cardiovascular events and  
19 297 cardiac damage [31]. Pneumonia and other infections can trigger fever, hypoxia, and  
20 298 hemodynamic disturbance in patients, which are all risk factors of AF and its associated  
21 299 cardiac damage [34]. In our analysis, *S. pneumoniae* infections were significantly associated  
22 300 with higher risks of stroke and AF, but not CHD and HF. These differences may be due to the  
23 301 presence of multiple mechanisms that differentially contribute to each type of cardiovascular  
24 302 event. Further studies are needed to explore these differences in greater depth.

25  
26  
27  
28  
29  
30  
31  
32  
33 303 The study limitations are as follows. First, *S. pneumoniae* infections and  
34 304 cardiovascular events were identified using diagnosis codes and ICD-10 codes, respectively.  
35 305 Therefore, our analysis may be vulnerable to coding errors. Second, our study could not  
36 306 account for patients' lifestyle factors (e.g., tobacco and alcohol consumption), socioeconomic  
37 307 factors, or pneumococcal vaccination statuses. In addition, we also could not account for  
38 308 differences in medications and treatments (especially at discharge) among the patients. Third,  
39 309 our study population was limited to enrollees of Japan's National Health Insurance and  
40 310 Latter-Stage Elderly Healthcare System, and the findings may not be extrapolatable to those  
41 311 enrolled in other insurance systems. Fourth, our study excluded patients with previous in-  
42 312 hospital cardiovascular events. However, the real-world population of patients would include  
43 313 those with such events. This approach could introduce selection bias and affect the  
44 314 comparability of our findings with real-world scenarios. Fifth, we excluded infected patients  
45 315 who were not matched with non-infected controls. With consideration to the relatively low  
46 316 number of infected patients, the exclusion of these non-matched patients could potentially  
47 317 reduce the power of our statistical analyses. Sixth, our study outcomes focused on  
48 318 cardiovascular events that resulted in hospitalization, and did not consider events without in-  
49 319 hospital care. Therefore, our study may overlook the impact of *S. pneumoniae* infection on  
50 320 subsequent occurrences of mild cardiovascular disease. Seventh, previous outpatient  
51 321 treatments were not included in the analysis, which could result in selection bias. Eighth, the

1  
2  
3 322 index date for matching was set as the last day of the month with *S. pneumoniae* infection  
4 323 instead of the claims date, which could result in lead-time bias. Finally, we did not consider  
5 324 the random effects of hospitals or municipalities in our multivariate analyses. Patients treated  
6 325 in the same hospital or municipality may be similar to one another. However, all the study  
7 326 municipalities were located in the same prefecture, and there were no major differences in  
8 327 characteristics at the regional or hospital level. Additionally, pneumonia is a common disease  
9 328 that hospitals regularly treat, and it is unlikely that there would be a large bias at the hospital  
10 329 level.  
11  
12  
13  
14  
15  
16

330

### 331 *Conclusion*

332 *S. pneumoniae* infections elevate the risk of subsequent stroke and AF occurrence. These  
333 findings indicate that pneumococcal infections do not only have short-term effects on patient  
334 health, but also increase the mid-to long-term susceptibility to serious cardiovascular events.  
335 With a greater understanding of *S. pneumoniae* infection's far-reaching impact, further studies  
336 are needed to explore the possible benefits of expanding current pneumococcal vaccination  
337 programs.  
338

339 **Contributorship statement** NN and HF designed the study. HF provided the data. NN analyzed the  
340 data. NN prepared the first draft of the manuscript. HF made critical revisions to the manuscript. All  
341 authors reviewed and approved the final draft.

342 **Competing interests** HF received an Investigator-Sponsored Research grant from Pfizer Japan Inc.

343 **Funding** The construction of the LIFE Study database was funded by a Grant-in-Aid for Scientific  
344 Research by the Japan Society for the Promotion of Science (Grant No. JP20H00563). Data analysis  
345 and publication were funded by an Investigator-Sponsored Research grant from Pfizer Japan Inc.

346 **Data sharing statement** The data used in this study were acquired under agreements with the  
347 participating municipalities, which stipulate that the data can only be used by authorized research  
348 institutions and cannot be shared with third parties.

### 349 **Ethics Approval**

350 The study was approved by the Kyushu University Institutional Review Board for Clinical Research  
351 (Approval No. 2021-423).

## References

1. Trotter CL, Stuart JM, George R, Miller E. Increasing hospital admissions for pneumonia, England. *Emerg Infect Dis* 2008; 14: 727–33
2. Eurich DT, Marrie TJ, Minhas-Sandhu JK, Majumdar SR. Ten-Year Mortality after Community-acquired Pneumonia. A Prospective Cohort. *Am J Respir Crit Care Med* 2015; 192: 597-604.
3. Musher DM. *Streptococcus pneumoniae*. In: Mandell GL, Bennett JE, Dolin R, eds. *Mandell, Douglass and Bennett's principles and practice of infectious diseases*. Philadelphia: Churchill Livingstone 2005: 2392–411
4. Fry AM, Shay DK, Holman RC, Curns AT, Anderson LJ. Trends in hospitalizations for pneumonia among persons aged 65 years or older in the United States, 1988–2002. *JAMA* 2005; 294: 2712–2719.
5. Jasti H, Mortensen EM, Obrosky DS, Kapoor WN, Fine MJ. Causes and risk factors for rehospitalization of patients hospitalized with community-acquired pneumonia. *Clin Infect Dis* 2008; 46: 550–6.
6. Postma DF, Spitoni C, Van Werkhoven CH, Van Elden LJR, Oosterheert JJ, Bonten MJM. Cardiac events after macrolides or fluoroquinolones in patients hospitalized for community-acquired pneumonia: Post-hoc analysis of a cluster-randomized trial. *BMC Infect Dis* 2019; 19: 17.
7. Corrales-Medina VF, Alvarez KN, Weissfeld LA, Angus DC, Chirinos JA, Chang CH, Newman A, Loehr L, Folsom AR, Elkind MS, et al. Association Between Hospitalization for Pneumonia and Subsequent Risk of Cardiovascular Disease. *JAMA* 2015; 313: 264–274.
8. Cangemi R, Calvieri C, Falcone M, et al. Relation of Cardiac Complications in the Early Phase of Community-Acquired Pneumonia to Long-Term Mortality and Cardiovascular Events. *Am J Cardiol* 2015; 116: 647-651.
9. Griffin AT, Wiemken TL, Arnold FW. Risk factors for cardiovascular events in hospitalized patients with community-acquired pneumonia. *Int J Infect Dis* 2013; 17: e1125-e1129.
10. Corrales-Medina VF, Musher DM, Wells GA, Chirinos JA, Chen L, Fine MJ. Cardiac complications in patients with community-acquired pneumonia: incidence, timing, risk factors, and association with short-term mortality. *Circulation* 2012; 125: 773-781.
11. Violi F, Cangemi R, Falcone M, et al. Cardiovascular Complications and Short-term Mortality Risk in Community-Acquired Pneumonia. *Clin Infect Dis* 2017; 64: 1486-1493.
12. Aliberti S, Ramirez J, Cosentini R, et al. Acute myocardial infarction versus other cardiovascular events in community-acquired pneumonia. *ERJ Open Res* 2015; 1: 00020-2015
13. Viasus D, Garcia-Vidal C, Manresa F, Dorca J, Gudiol F, Carratalà J. Risk stratification and prognosis of acute cardiac events in hospitalized adults with community-acquired pneumonia. *J Infect* 2013; 66: 27-33.
14. Cilli A, Cakin O, Aksoy E, et al. Acute cardiac events in severe community-acquired pneumonia: A multicenter study. *Clin Respir J* 2018; 12: 2212-2219.
15. Chen PC, Liao WI, Wang YC, et al. An Elevated Glycemic Gap is Associated With Adverse Outcomes in Diabetic Patients With Community-Acquired Pneumonia. *Medicine* 2015; 94: e1456.
16. Perry TW, Pugh MJ, Waterer GW, et al. Incidence of cardiovascular events after hospital admission for pneumonia. *Am J Med* 2011; 124: 244-251.
17. Mandal P, Chalmers JD, Choudhury G, Akram AR, Hill AT. Vascular complications are associated with poor outcome in community-acquired pneumonia. *QJM* 2011; 104: 489-495.
18. Eurich DT, Marrie TJ, Minhas-Sandhu JK, Majumdar SR. Risk of heart failure after community acquired pneumonia: prospective controlled study with 10 years of follow-up. *BMJ* 2017; 356: j413.
19. Cangemi R, Calvieri C, Taliani G, et al. Left Atrium Dilatation and Left Ventricular Hypertrophy Predispose to Atrial Fibrillation in Patients With Community-Acquired Pneumonia. *Am J Cardiol* 2019; 124: 723-728.
20. Pieralli F, Biondo B, Vannucchi V, et al. Performance of the CHA2DS2-VASc score in predicting new onset atrial fibrillation during hospitalization for community-acquired pneumonia. *Eur J Intern Med* 2019; 62: 24-28.
21. Corrales-Medina VF, Serpa J, Rueda AM, et al. Acute bacterial pneumonia is associated with the occurrence of acute coronary syndromes. *Medicine*. 2009; 88: 154-159.
22. Fukuda H, Ishiguro C, Ono R, Kiyohara K. The Longevity Improvement & Fair Evidence (LIFE) Study: Overview of the Study Design and Baseline Participant Profile. *J Epidemiol* 2022; 10.2188
23. Imai K, Petigara T, Kohn MA, Nakashima K, Aoshima M, Shito A, Kanazu S. Risk of pneumococcal diseases in adults with underlying medical conditions: a retrospective, cohort study using two Japanese healthcare databases. *BMJ Open* 2018; 8: e018553.
24. Quan H, Li B, Couris CM, et al. Updating and validating the Charlson comorbidity index and score for risk adjustment in hospital discharge abstracts using data from 6 countries. *Am J Epidemiol* 2011; 173: 676-682.
25. Tralhão A, Póvoa P. Cardiovascular Events After Community-Acquired Pneumonia: A Global Perspective with Systematic Review and Meta-Analysis of Observational Studies. *J Clin Med* 2020; 9: 414.
26. Musher DM, Rueda AM, Kaka AS, Mapara SM. The association between pneumococcal pneumonia and acute cardiac events. *Clin Infect Dis* 2007; 45: 158-165.
27. Chong CP, Street PR. Pneumonia in the elderly: a review of the epidemiology, pathogenesis, microbiology,

- 1  
2  
3 413 and clinical features. *South Med J* 2008; 101: 1141-1179.
- 4 414 28. Fillon S, Soulis K, Rajasekaran S, et al. Platelet-activating factor receptor and innate immunity: uptake of  
5 415 gram-positive bacterial cell wall into host cells and cell-specific pathophysiology. *J Immunol* 2006; 177:  
6 416 6182-6191.
- 7 417 29. Feldman C, Anderson R. Platelets and Their Role in the Pathogenesis of Cardiovascular Events in Patients  
8 418 With Community-Acquired Pneumonia. *Front Immunol* 2020; 11: 577303.
- 9 419 30. Feldman C, Normark S, Henriques-Normark B, Anderson R. Pathogenesis and prevention of risk of  
10 420 cardiovascular events in patients with pneumococcal community-acquired pneumonia. *J Intern Med* 2019;  
11 421 285: 635-652.
- 12 422 31. Anderson R, Nel JG, Feldman C. Multifaceted Role of Pneumolysin in the Pathogenesis of Myocardial Injury  
13 423 in Community-Acquired Pneumonia. *Int J Mol Sci* 2018; 19: 1147.
- 14 424 32. Shenoy AT, Beno SM, Brissac T, Bell JW, Novak L, Orihuela CJ. Severity and properties of cardiac damage  
15 425 caused by *Streptococcus pneumoniae* are strain dependent. *PLoS One* 2018; 13: e0204032.
- 16 426 33. Alhamdi Y, Neill DR, Abrams ST, et al. Circulating Pneumolysin Is a Potent Inducer of Cardiac Injury during  
17 427 Pneumococcal Infection. *PLoS Pathog* 2015; 11: e1004836.
- 18 428 34. Kirchhof P, Benussi S, Kotecha D, et al. 2016 ESC Guidelines for the management of atrial fibrillation  
19 429 developed in collaboration with EACTS. *Eur Heart J* 2016; 37: 2893-2962.
- 20  
21  
22  
23  
24  
25  
26  
27  
28  
29  
30  
31  
32  
33  
34  
35  
36  
37  
38  
39  
40  
41  
42  
43  
44  
45  
46  
47  
48  
49  
50  
51  
52  
53  
54  
55  
56  
57  
58  
59  
60



1  
2  
3  
4 **Figure 1. Overview of the follow-up process for *Streptococcus pneumoniae*-infected and non-infected**  
5 **patients**  
6

7  
8  
9 Endpoints refer to the occurrence of a target cardiovascular event.  
10

11  
12  
13 **Figure 2. Selection of *Streptococcus pneumoniae*-infected and non-infected patients for analysis**  
14

15  
16 Prior CHD, HF, stroke, and AF refer only to previous events with in-hospital treatments. Abbreviations: CHD,  
17 coronary heart disease; HF, heart failure; AF, atrial fibrillation.  
18  
19

20  
21  
22  
23  
24 **Figure 3. Kaplan–Meier estimates for cardiovascular events in *Streptococcus pneumoniae*-infected and**  
25 **non-infected patients**  
26

27  
28  
29  
30 (A) Coronary heart disease (CHD), (B) heart failure (HF), (C) stroke, and (D) AF (Atrial fibrillation)  
31  
32

33  
34  
35  
36 **Figure 4. Cumulative incidence curves for cardiovascular events in *Streptococcus pneumoniae*-infected**  
37 **and non-infected patients**  
38

39  
40  
41  
42 (A) Coronary heart disease (CHD), (B) heart failure (HF), (C) stroke, and (D) AF (Atrial fibrillation)  
43  
44  
45  
46  
47  
48  
49  
50  
51  
52  
53  
54  
55  
56  
57  
58  
59  
60

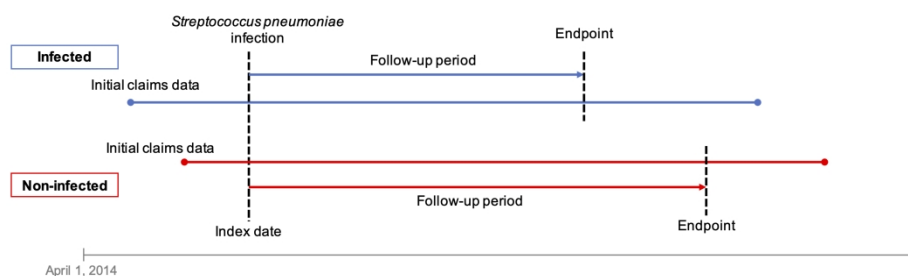

Figure 1. Overview of the follow-up process for Streptococcus pneumoniae-infected and non-infected patients

Legend: Endpoints refer to the occurrence of a target cardiovascular event.

1028x342mm (72 x 72 DPI)

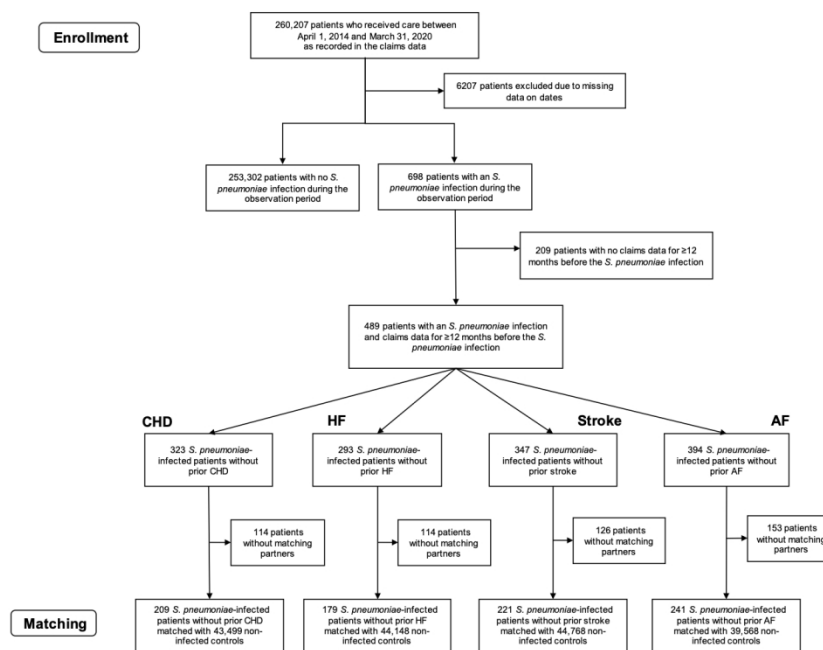

29  
30  
31  
32  
33  
34  
35  
36  
37  
38  
39  
40  
41  
42  
43  
44  
45  
46  
47  
48  
49  
50  
51  
52  
53  
54  
55  
56  
57  
58  
59

Figure 2. Selection of Streptococcus pneumoniae-infected and non-infected patients for analysis  
Legend: Prior CHD, HF, stroke, and AF refer only to previous events with in-hospital treatments.  
Abbreviations: CHD, coronary heart disease; HF, heart failure; AF, atrial fibrillation.

579x403mm (72 x 72 DPI)

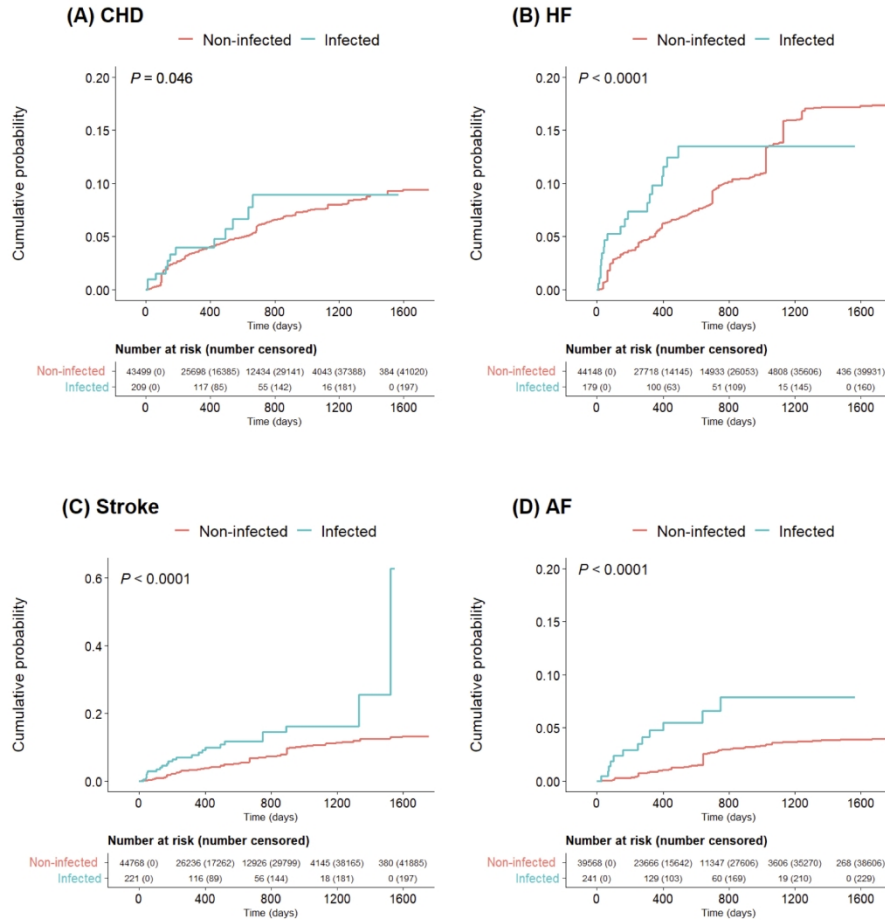

Figure 3. Kaplan–Meier estimates for cardiovascular events in Streptococcus pneumoniae-infected and non-infected patients

Legend: (A) Coronary heart disease (CHD), (B) heart failure (HF), (C) stroke, and (D) AF (Atrial fibrillation)

624x666mm (72 x 72 DPI)

1  
2  
3  
4  
5  
6  
7  
8  
9  
10  
11  
12  
13  
14  
15  
16  
17  
18  
19  
20  
21  
22  
23  
24  
25  
26  
27  
28  
29  
30  
31  
32  
33  
34  
35  
36  
37  
38  
39  
40  
41  
42  
43  
44  
45  
46  
47  
48  
49  
50  
51  
52  
53  
54  
55  
56  
57  
58  
59  
60

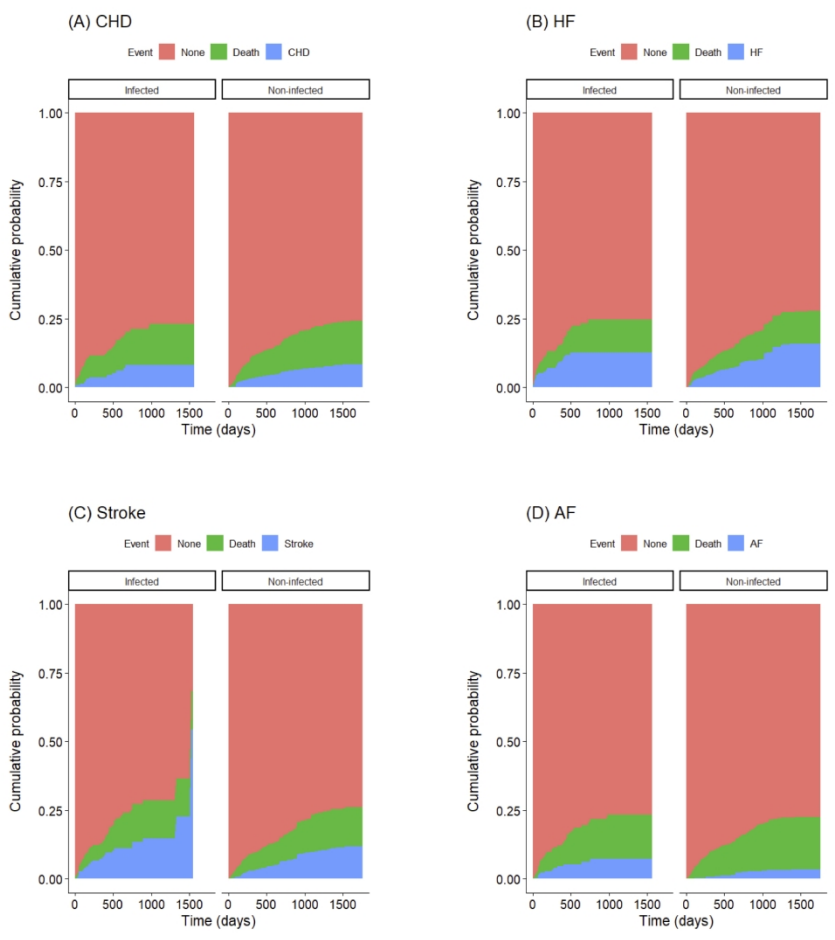

Figure 4. Cumulative incidence curves for cardiovascular events in *Streptococcus pneumoniae*-infected and non-infected patients  
 Legend: (A) Coronary heart disease (CHD), (B) heart failure (HF), (C) stroke, and (D) AF (Atrial fibrillation)

624x666mm (72 x 72 DPI)

Supplementary Table 1. Covariate balance before and after matching for coronary heart disease

|                                        | Coronary heart disease |                  |                                     |                  |                  |                                     |
|----------------------------------------|------------------------|------------------|-------------------------------------|------------------|------------------|-------------------------------------|
|                                        | Unmatched              |                  |                                     | Matched          |                  |                                     |
|                                        | Mean<br>Infected       | Non-<br>infected | Standardized<br>mean<br>differences | Mean<br>Infected | Non-<br>infected | Standardized<br>mean<br>differences |
| Age                                    | 77.84                  | 68.41            | 0.48                                | 77.08            | 77.03            | 0.0043                              |
| Sex                                    | 0.48                   | 0.60             | 0.25                                | 0.49             | 0.49             | 0.00                                |
| Hospital admission                     | 0.79                   | 0.02             | 5.58                                | 0.70             | 0.70             | 0.00                                |
| Myocardial infarction                  | 0.01                   | 0.01             | 0.02                                | 0.00             | 0.00             | 0.00                                |
| Congestive heart failure               | 0.20                   | 0.06             | 0.60                                | 0.11             | 0.11             | 0.00                                |
| Peripheral vascular disease            | 0.08                   | 0.05             | 0.14                                | 0.03             | 0.03             | 0.00                                |
| Cerebrovascular disease                | 0.25                   | 0.12             | 0.43                                | 0.14             | 0.14             | 0.00                                |
| Dementia                               | 0.21                   | 0.05             | 0.68                                | 0.14             | 0.14             | 0.00                                |
| Chronic pulmonary disease              | 0.37                   | 0.10             | 0.89                                | 0.29             | 0.29             | 0.00                                |
| Rheumatic disease                      | 0.06                   | 0.02             | 0.32                                | 0.01             | 0.01             | 0.00                                |
| Peptic ulcer disease                   | 0.13                   | 0.04             | 0.40                                | 0.07             | 0.07             | 0.00                                |
| Mild liver disease                     | 0.20                   | 0.12             | 0.25                                | 0.16             | 0.16             | 0.00                                |
| Diabetes without chronic complications | 0.06                   | 0.01             | 0.68                                | 0.01             | 0.01             | 0.00                                |
| Diabetes with chronic complications    | 0.05                   | 0.03             | 0.12                                | 0.03             | 0.03             | 0.00                                |
| Hemiplegia or paraplegia               | 0.02                   | 0.01             | 0.19                                | 0.00             | 0.00             | 0.00                                |
| Renal disease                          | 0.07                   | 0.03             | 0.26                                | 0.01             | 0.01             | 0.00                                |
| Malignancy                             | 0.15                   | 0.05             | 0.42                                | 0.08             | 0.08             | 0.00                                |
| Moderate or severe liver disease       | 0.00                   | 0.00             | 0.05                                | 0.00             | 0.00             | 0.00                                |
| Metastatic solid tumor                 | 0.03                   | 0.01             | 0.25                                | 0.02             | 0.02             | 0.00                                |
| HIV/AIDS                               | 0.00                   | 0.00             | 0.01                                | 0.00             | 0.00             | 0.00                                |

**Supplementary Table 2. Covariate balance before and after matching for heart failure**

|                                        | Heart failure    |                  |                                     |                  |                  |                                     |
|----------------------------------------|------------------|------------------|-------------------------------------|------------------|------------------|-------------------------------------|
|                                        | Unmatched        |                  |                                     | Matched          |                  |                                     |
|                                        | Mean<br>Infected | Non-<br>infected | Standardized<br>mean<br>differences | Mean<br>Infected | Non-<br>infected | Standardized<br>mean<br>differences |
| Age                                    | 77.08            | 68.42            | 0.45                                | 75.56            | 75.36            | 0.016                               |
| Sex                                    | 0.43             | 0.59             | 0.34                                | 0.45             | 0.45             | 0.00                                |
| Hospital admission                     | 0.78             | 0.02             | 5.40                                | 0.66             | 0.66             | 0.00                                |
| Myocardial infarction                  | 0.02             | 0.01             | 0.13                                | 0.01             | 0.01             | 0.00                                |
| Congestive heart failure               | 0.10             | 0.05             | 0.22                                | 0.02             | 0.02             | 0.00                                |
| Peripheral vascular disease            | 0.12             | 0.05             | 0.29                                | 0.03             | 0.03             | 0.00                                |
| Cerebrovascular disease                | 0.25             | 0.12             | 0.42                                | 0.12             | 0.12             | 0.00                                |
| Dementia                               | 0.19             | 0.05             | 0.64                                | 0.11             | 0.11             | 0.00                                |
| Chronic pulmonary disease              | 0.39             | 0.10             | 0.95                                | 0.32             | 0.32             | 0.00                                |
| Rheumatic disease                      | 0.06             | 0.02             | 0.31                                | 0.03             | 0.03             | 0.00                                |
| Peptic ulcer disease                   | 0.15             | 0.05             | 0.51                                | 0.08             | 0.08             | 0.00                                |
| Mild liver disease                     | 0.23             | 0.12             | 0.33                                | 0.17             | 0.17             | 0.00                                |
| Diabetes without chronic complications | 0.06             | 0.01             | 0.65                                | 0.01             | 0.01             | 0.00                                |
| Diabetes with chronic complications    | 0.06             | 0.03             | 0.18                                | 0.04             | 0.04             | 0.00                                |
| Hemiplegia or paraplegia               | 0.02             | 0.01             | 0.18                                | 0.00             | 0.00             | 0.00                                |
| Renal disease                          | 0.08             | 0.03             | 0.33                                | 0.01             | 0.01             | 0.00                                |
| Malignancy                             | 0.18             | 0.05             | 0.54                                | 0.11             | 0.11             | 0.00                                |
| Moderate or severe liver disease       | 0.01             | 0.00             | 0.09                                | 0.00             | 0.00             | 0.00                                |
| Metastatic solid tumor                 | 0.02             | 0.01             | 0.11                                | 0.02             | 0.02             | 0.00                                |
| HIV/AIDS                               | 0.00             | 0.00             | 0.01                                | 0.00             | 0.00             | 0.00                                |

**Supplementary Table 3. Covariate balance before and after matching for stroke**

|                                        | Stroke           |                  |                                     |                  |                  |                                     |
|----------------------------------------|------------------|------------------|-------------------------------------|------------------|------------------|-------------------------------------|
|                                        | Unmatched        |                  |                                     | Matched          |                  |                                     |
|                                        | Mean<br>Infected | Non-<br>infected | Standardized<br>mean<br>differences | Mean<br>Infected | Non-<br>infected | Standardized<br>mean<br>differences |
| Age                                    | 78.20            | 68.57            | 0.50                                | 77.66            | 77.53            | 0.011                               |
| Sex                                    | 0.46             | 0.60             | 0.29                                | 0.49             | 0.49             | 0.00                                |
| Hospital admission                     | 0.80             | 0.02             | 5.41                                | 0.71             | 0.71             | 0.00                                |
| Myocardial infarction                  | 0.03             | 0.01             | 0.11                                | 0.00             | 0.00             | 0.00                                |
| Congestive heart failure               | 0.20             | 0.07             | 0.52                                | 0.09             | 0.09             | 0.00                                |
| Peripheral vascular disease            | 0.11             | 0.05             | 0.24                                | 0.03             | 0.03             | 0.00                                |
| Cerebrovascular disease                | 0.20             | 0.10             | 0.31                                | 0.10             | 0.10             | 0.00                                |
| Dementia                               | 0.17             | 0.05             | 0.53                                | 0.12             | 0.12             | 0.00                                |
| Chronic pulmonary disease              | 0.37             | 0.11             | 0.88                                | 0.29             | 0.29             | 0.00                                |
| Rheumatic disease                      | 0.05             | 0.02             | 0.28                                | 0.02             | 0.02             | 0.00                                |
| Peptic ulcer disease                   | 0.11             | 0.05             | 0.31                                | 0.06             | 0.06             | 0.00                                |
| Mild liver disease                     | 0.19             | 0.12             | 0.21                                | 0.15             | 0.15             | 0.00                                |
| Diabetes without chronic complications | 0.04             | 0.01             | 0.42                                | 0.01             | 0.01             | 0.00                                |
| Diabetes with chronic complications    | 0.05             | 0.03             | 0.16                                | 0.03             | 0.03             | 0.00                                |
| Hemiplegia or paraplegia               | 0.02             | 0.01             | 0.18                                | 0.00             | 0.00             | 0.00                                |
| Renal disease                          | 0.10             | 0.03             | 0.39                                | 0.02             | 0.02             | 0.00                                |
| Malignancy                             | 0.15             | 0.06             | 0.41                                | 0.09             | 0.09             | 0.00                                |
| Moderate or severe liver disease       | 0.00             | 0.00             | 0.05                                | 0.00             | 0.00             | 0.00                                |
| Metastatic solid tumor                 | 0.01             | 0.01             | 0.07                                | 0.01             | 0.01             | 0.00                                |
| HIV/AIDS                               | 0.00             | 0.00             | 0.01                                | 0.00             | 0.00             | 0.00                                |



**Supplementary Table 4. Covariate balance before and after matching for atrial fibrillation**

|                                        | Atrial fibrillation      |                  |                                     |                          |                  |                                     |
|----------------------------------------|--------------------------|------------------|-------------------------------------|--------------------------|------------------|-------------------------------------|
|                                        | Unmatched                |                  |                                     | Matched                  |                  |                                     |
|                                        | Mean<br>Non-<br>infected | Mean<br>Infected | Standardized<br>mean<br>differences | Mean<br>Non-<br>infected | Mean<br>Infected | Standardized<br>mean<br>differences |
| Age                                    | 78.70                    | 68.92            | 0.51                                | 77.67                    | 77.52            | 0.012                               |
| Sex                                    | 0.45                     | 0.60             | 0.29                                | 0.48                     | 0.48             | 0.00                                |
| Hospital admission                     | 0.83                     | 0.02             | 5.42                                | 0.74                     | 0.74             | 0.00                                |
| Myocardial infarction                  | 0.02                     | 0.01             | 0.09                                | 0.00                     | 0.00             | 0.00                                |
| Congestive heart failure               | 0.20                     | 0.07             | 0.52                                | 0.11                     | 0.11             | 0.00                                |
| Peripheral vascular disease            | 0.10                     | 0.05             | 0.21                                | 0.03                     | 0.03             | 0.00                                |
| Cerebrovascular disease                | 0.26                     | 0.12             | 0.42                                | 0.13                     | 0.13             | 0.00                                |
| Dementia                               | 0.19                     | 0.06             | 0.55                                | 0.12                     | 0.12             | 0.00                                |
| Chronic pulmonary disease              | 0.38                     | 0.11             | 0.90                                | 0.28                     | 0.28             | 0.00                                |
| Rheumatic disease                      | 0.06                     | 0.02             | 0.32                                | 0.02                     | 0.02             | 0.00                                |
| Peptic ulcer disease                   | 0.12                     | 0.05             | 0.36                                | 0.05                     | 0.05             | 0.00                                |
| Mild liver disease                     | 0.18                     | 0.12             | 0.18                                | 0.12                     | 0.12             | 0.00                                |
| Diabetes without chronic complications | 0.05                     | 0.01             | 0.53                                | 0.01                     | 0.01             | 0.00                                |
| Diabetes with chronic complications    | 0.06                     | 0.03             | 0.19                                | 0.03                     | 0.03             | 0.00                                |
| Hemiplegia or paraplegia               | 0.02                     | 0.01             | 0.16                                | 0.00                     | 0.00             | 0.00                                |
| Renal disease                          | 0.10                     | 0.03             | 0.41                                | 0.02                     | 0.02             | 0.00                                |
| Malignancy                             | 0.17                     | 0.06             | 0.50                                | 0.08                     | 0.08             | 0.00                                |
| Moderate or severe liver disease       | 0.01                     | 0.00             | 0.05                                | 0.00                     | 0.00             | 0.00                                |
| Metastatic solid tumor                 | 0.02                     | 0.01             | 0.17                                | 0.02                     | 0.02             | 0.00                                |
| HIV/AIDS                               | 0.00                     | 0.00             | 0.01                                | 0.00                     | 0.00             | 0.00                                |
| Atrial fibrillation                    | 0.03                     | 0.03             | 0.02                                | 0.01                     | 0.01             | 0.00                                |
