# Supplementary material for: Risk of cardiovascular events leading to hospitalisation after Streptococcus pneumoniae infection: a retrospective cohort LIFE Study
Source: PubMed Central journal article supplement — BMJ Open. 2022 Nov 4;12(11):e059713. doi: 10.1136/bmjopen-2021-059713 (PMC9639073; doi:10.1136/bmjopen-2021-059713), 2022-11-04
Supplement: bmjopen-2021-059713supp001.pdf [file bmjopen-2021-059713supp001.pdf]

**Supplementary Table 1. Covariate balance before and after matching for coronary heart disease**

|                                        | Coronary heart disease |                  |                                     |                  |                  |                                     |
|----------------------------------------|------------------------|------------------|-------------------------------------|------------------|------------------|-------------------------------------|
|                                        | Unmatched              |                  |                                     | Matched          |                  |                                     |
|                                        | Mean<br>Infected       | Non-<br>infected | Standardized<br>mean<br>differences | Mean<br>Infected | Non-<br>infected | Standardized<br>mean<br>differences |
| Age                                    | 77.84                  | 68.41            | 0.48                                | 77.08            | 77.03            | 0.0043                              |
| Sex                                    | 0.48                   | 0.60             | 0.25                                | 0.49             | 0.49             | 0.00                                |
| Hospital admission                     | 0.79                   | 0.02             | 5.58                                | 0.70             | 0.70             | 0.00                                |
| Myocardial infarction                  | 0.01                   | 0.01             | 0.02                                | 0.00             | 0.00             | 0.00                                |
| Congestive heart failure               | 0.20                   | 0.06             | 0.60                                | 0.11             | 0.11             | 0.00                                |
| Peripheral vascular disease            | 0.08                   | 0.05             | 0.14                                | 0.03             | 0.03             | 0.00                                |
| Cerebrovascular disease                | 0.25                   | 0.12             | 0.43                                | 0.14             | 0.14             | 0.00                                |
| Dementia                               | 0.21                   | 0.05             | 0.68                                | 0.14             | 0.14             | 0.00                                |
| Chronic pulmonary disease              | 0.37                   | 0.10             | 0.89                                | 0.29             | 0.29             | 0.00                                |
| Rheumatic disease                      | 0.06                   | 0.02             | 0.32                                | 0.01             | 0.01             | 0.00                                |
| Peptic ulcer disease                   | 0.13                   | 0.04             | 0.40                                | 0.07             | 0.07             | 0.00                                |
| Mild liver disease                     | 0.20                   | 0.12             | 0.25                                | 0.16             | 0.16             | 0.00                                |
| Diabetes without chronic complications | 0.06                   | 0.01             | 0.68                                | 0.01             | 0.01             | 0.00                                |
| Diabetes with chronic complications    | 0.05                   | 0.03             | 0.12                                | 0.03             | 0.03             | 0.00                                |
| Hemiplegia or paraplegia               | 0.02                   | 0.01             | 0.19                                | 0.00             | 0.00             | 0.00                                |
| Renal disease                          | 0.07                   | 0.03             | 0.26                                | 0.01             | 0.01             | 0.00                                |
| Malignancy                             | 0.15                   | 0.05             | 0.42                                | 0.08             | 0.08             | 0.00                                |
| Moderate or severe liver disease       | 0.00                   | 0.00             | 0.05                                | 0.00             | 0.00             | 0.00                                |
| Metastatic solid tumor                 | 0.03                   | 0.01             | 0.25                                | 0.02             | 0.02             | 0.00                                |
| HIV/AIDS                               | 0.00                   | 0.00             | 0.01                                | 0.00             | 0.00             | 0.00                                |

**Supplementary Table 2. Covariate balance before and after matching for heart failure**

|                                        | Heart failure    |                  |                                     |                  |                  |                                     |
|----------------------------------------|------------------|------------------|-------------------------------------|------------------|------------------|-------------------------------------|
|                                        | Unmatched        |                  |                                     | Matched          |                  |                                     |
|                                        | Mean<br>Infected | Non-<br>infected | Standardized<br>mean<br>differences | Mean<br>Infected | Non-<br>infected | Standardized<br>mean<br>differences |
| Age                                    | 77.08            | 68.42            | 0.45                                | 75.56            | 75.36            | 0.016                               |
| Sex                                    | 0.43             | 0.59             | 0.34                                | 0.45             | 0.45             | 0.00                                |
| Hospital admission                     | 0.78             | 0.02             | 5.40                                | 0.66             | 0.66             | 0.00                                |
| Myocardial infarction                  | 0.02             | 0.01             | 0.13                                | 0.01             | 0.01             | 0.00                                |
| Congestive heart failure               | 0.10             | 0.05             | 0.22                                | 0.02             | 0.02             | 0.00                                |
| Peripheral vascular disease            | 0.12             | 0.05             | 0.29                                | 0.03             | 0.03             | 0.00                                |
| Cerebrovascular disease                | 0.25             | 0.12             | 0.42                                | 0.12             | 0.12             | 0.00                                |
| Dementia                               | 0.19             | 0.05             | 0.64                                | 0.11             | 0.11             | 0.00                                |
| Chronic pulmonary disease              | 0.39             | 0.10             | 0.95                                | 0.32             | 0.32             | 0.00                                |
| Rheumatic disease                      | 0.06             | 0.02             | 0.31                                | 0.03             | 0.03             | 0.00                                |
| Peptic ulcer disease                   | 0.15             | 0.05             | 0.51                                | 0.08             | 0.08             | 0.00                                |
| Mild liver disease                     | 0.23             | 0.12             | 0.33                                | 0.17             | 0.17             | 0.00                                |
| Diabetes without chronic complications | 0.06             | 0.01             | 0.65                                | 0.01             | 0.01             | 0.00                                |
| Diabetes with chronic complications    | 0.06             | 0.03             | 0.18                                | 0.04             | 0.04             | 0.00                                |
| Hemiplegia or paraplegia               | 0.02             | 0.01             | 0.18                                | 0.00             | 0.00             | 0.00                                |
| Renal disease                          | 0.08             | 0.03             | 0.33                                | 0.01             | 0.01             | 0.00                                |
| Malignancy                             | 0.18             | 0.05             | 0.54                                | 0.11             | 0.11             | 0.00                                |
| Moderate or severe liver disease       | 0.01             | 0.00             | 0.09                                | 0.00             | 0.00             | 0.00                                |
| Metastatic solid tumor                 | 0.02             | 0.01             | 0.11                                | 0.02             | 0.02             | 0.00                                |
| HIV/AIDS                               | 0.00             | 0.00             | 0.01                                | 0.00             | 0.00             | 0.00                                |

**Supplementary Table 3. Covariate balance before and after matching for stroke**

|                                        | Stroke           |                          |                                     |                  |                          |                                     |
|----------------------------------------|------------------|--------------------------|-------------------------------------|------------------|--------------------------|-------------------------------------|
|                                        | Unmatched        |                          |                                     | Matched          |                          |                                     |
|                                        | Mean<br>Infected | Mean<br>Non-<br>infected | Standardized<br>mean<br>differences | Mean<br>Infected | Mean<br>Non-<br>infected | Standardized<br>mean<br>differences |
| Age                                    | 78.20            | 68.57                    | 0.50                                | 77.66            | 77.53                    | 0.011                               |
| Sex                                    | 0.46             | 0.60                     | 0.29                                | 0.49             | 0.49                     | 0.00                                |
| Hospital admission                     | 0.80             | 0.02                     | 5.41                                | 0.71             | 0.71                     | 0.00                                |
| Myocardial infarction                  | 0.03             | 0.01                     | 0.11                                | 0.00             | 0.00                     | 0.00                                |
| Congestive heart failure               | 0.20             | 0.07                     | 0.52                                | 0.09             | 0.09                     | 0.00                                |
| Peripheral vascular disease            | 0.11             | 0.05                     | 0.24                                | 0.03             | 0.03                     | 0.00                                |
| Cerebrovascular disease                | 0.20             | 0.10                     | 0.31                                | 0.10             | 0.10                     | 0.00                                |
| Dementia                               | 0.17             | 0.05                     | 0.53                                | 0.12             | 0.12                     | 0.00                                |
| Chronic pulmonary disease              | 0.37             | 0.11                     | 0.88                                | 0.29             | 0.29                     | 0.00                                |
| Rheumatic disease                      | 0.05             | 0.02                     | 0.28                                | 0.02             | 0.02                     | 0.00                                |
| Peptic ulcer disease                   | 0.11             | 0.05                     | 0.31                                | 0.06             | 0.06                     | 0.00                                |
| Mild liver disease                     | 0.19             | 0.12                     | 0.21                                | 0.15             | 0.15                     | 0.00                                |
| Diabetes without chronic complications | 0.04             | 0.01                     | 0.42                                | 0.01             | 0.01                     | 0.00                                |
| Diabetes with chronic complications    | 0.05             | 0.03                     | 0.16                                | 0.03             | 0.03                     | 0.00                                |
| Hemiplegia or paraplegia               | 0.02             | 0.01                     | 0.18                                | 0.00             | 0.00                     | 0.00                                |
| Renal disease                          | 0.10             | 0.03                     | 0.39                                | 0.02             | 0.02                     | 0.00                                |
| Malignancy                             | 0.15             | 0.06                     | 0.41                                | 0.09             | 0.09                     | 0.00                                |
| Moderate or severe liver disease       | 0.00             | 0.00                     | 0.05                                | 0.00             | 0.00                     | 0.00                                |
| Metastatic solid tumor                 | 0.01             | 0.01                     | 0.07                                | 0.01             | 0.01                     | 0.00                                |
| HIV/AIDS                               | 0.00             | 0.00                     | 0.01                                | 0.00             | 0.00                     | 0.00                                |

**Supplementary Table 4. Covariate balance before and after matching for atrial fibrillation**

|                                           | Atrial fibrillation      |          |                                     |                          |          |                                     |
|-------------------------------------------|--------------------------|----------|-------------------------------------|--------------------------|----------|-------------------------------------|
|                                           | Unmatched                |          |                                     | Matched                  |          |                                     |
|                                           | Mean<br>Non-<br>infected | Infected | Standardized<br>mean<br>differences | Mean<br>Non-<br>infected | Infected | Standardized<br>mean<br>differences |
| Age                                       | 78.70                    | 68.92    | 0.51                                | 77.67                    | 77.52    | 0.012                               |
| Sex                                       | 0.45                     | 0.60     | 0.29                                | 0.48                     | 0.48     | 0.00                                |
| Hospital admission                        | 0.83                     | 0.02     | 5.42                                | 0.74                     | 0.74     | 0.00                                |
| Myocardial infarction                     | 0.02                     | 0.01     | 0.09                                | 0.00                     | 0.00     | 0.00                                |
| Congestive heart failure                  | 0.20                     | 0.07     | 0.52                                | 0.11                     | 0.11     | 0.00                                |
| Peripheral vascular disease               | 0.10                     | 0.05     | 0.21                                | 0.03                     | 0.03     | 0.00                                |
| Cerebrovascular disease                   | 0.26                     | 0.12     | 0.42                                | 0.13                     | 0.13     | 0.00                                |
| Dementia                                  | 0.19                     | 0.06     | 0.55                                | 0.12                     | 0.12     | 0.00                                |
| Chronic pulmonary disease                 | 0.38                     | 0.11     | 0.90                                | 0.28                     | 0.28     | 0.00                                |
| Rheumatic disease                         | 0.06                     | 0.02     | 0.32                                | 0.02                     | 0.02     | 0.00                                |
| Peptic ulcer disease                      | 0.12                     | 0.05     | 0.36                                | 0.05                     | 0.05     | 0.00                                |
| Mild liver disease                        | 0.18                     | 0.12     | 0.18                                | 0.12                     | 0.12     | 0.00                                |
| Diabetes without chronic<br>complications | 0.05                     | 0.01     | 0.53                                | 0.01                     | 0.01     | 0.00                                |
| Diabetes with chronic<br>complications    | 0.06                     | 0.03     | 0.19                                | 0.03                     | 0.03     | 0.00                                |
| Hemiplegia or paraplegia                  | 0.02                     | 0.01     | 0.16                                | 0.00                     | 0.00     | 0.00                                |
| Renal disease                             | 0.10                     | 0.03     | 0.41                                | 0.02                     | 0.02     | 0.00                                |
| Malignancy                                | 0.17                     | 0.06     | 0.50                                | 0.08                     | 0.08     | 0.00                                |
| Moderate or severe liver<br>disease       | 0.01                     | 0.00     | 0.05                                | 0.00                     | 0.00     | 0.00                                |
| Metastatic solid tumor                    | 0.02                     | 0.01     | 0.17                                | 0.02                     | 0.02     | 0.00                                |
| HIV/AIDS                                  | 0.00                     | 0.00     | 0.01                                | 0.00                     | 0.00     | 0.00                                |
| Atrial fibrillation                       | 0.03                     | 0.03     | 0.02                                | 0.01                     | 0.01     | 0.00                                |
